# Supplementary material for: Removing the superfluous: a supported squaramide catalyst with a minimalistic linker applied to the enantioselective flow synthesis of pyranonaphthoquinones
Source: Royal Society of Chemistry journal article supplement (doi:10.1039/c6cy00473c), 2016-01-01

*Supporting Information*

**Removing the superfluous: a supported squaramide catalyst with a  
minimalistic linker applied to the enantioselective flow synthesis of  
pyranonaphthoquinones**

Laura Osorio-Planes, Carles Rodríguez-Escrich and Miquel A. Pericàs\*

mapericas@iciq.es

Institute of Chemical Research of Catalonia (ICIQ)  
Av. Països Catalans, 16, 43007 Tarragona (Spain), The Barcelona Institute of Science and Technology  
and  
Departament de Química Orgànica, Universitat de Barcelona (UB), 08028 Barcelona (Spain)

Table of Contents

|                                                                                                  |     |
|--------------------------------------------------------------------------------------------------|-----|
| 1. General information                                                                           | S2  |
| 2. Preparation of Morita-Baylis-Hillman acetates <b>6</b>                                        | S3  |
| 3. Preparation of catalytic resins <b>2-5</b>                                                    | S4  |
| 4. General procedure for the synthesis of <b>8a</b> in batch                                     | S8  |
| 5. Optimization of the cyclization reaction in flow                                              | S9  |
| 6. Preparation of the library of enantioenriched pyranonaphthoquinones in<br>flow ( <i>GP1</i> ) | S10 |
| 7. Stereochemical model to account for the observed selectivity                                  | S10 |
| 8. Characterization of <b>7a</b>                                                                 | S11 |
| 9. Characterization of compounds <b>8a-8g</b>                                                    | S12 |
| 10. <sup>1</sup> H and <sup>13</sup> C NMR spectra                                               | S14 |
| 11. HPLC chromatograms                                                                           | S29 |

## 1. General information

Unless otherwise stated, all commercial reagents were used as received. Flash chromatography was carried out using 60 mesh silica gel and dry-packed columns. Thin layer chromatography was carried out using Merck TLC Silicagel 60 F254 aluminum sheets. Components were visualized by UV light ( $\lambda = 254$  nm) and stained with *p*-anisaldehyde or phosphomolybdic acid dip. NMR spectra were recorded at 298 K on a Fourier 300 MHz Bruker, a Bruker Avance 400 Ultrashield or a Bruker Avance 500 Ultrashield apparatus.  $^1\text{H}$  NMR spectroscopy chemical shifts are quoted in ppm relative to tetramethylsilane (TMS).  $\text{CDCl}_3$  was used as internal standard for  $^{13}\text{C}$  NMR spectra. Chemical shifts are given in  $\delta$  and coupling constants in Hz. IR spectra were recorded on a Bruker Tensor 27 FT-IR spectrometer. Elemental analyses of the polystyrene supported catalysts were performed on a LECO CHNS 932 micro-analyzer at the Universidad Complutense de Madrid (Spain) or at MEDAC Ltd. (Surrey, UK). High performance liquid chromatography (HPLC) was performed on an Agilent Technologies chromatograph (1100 Series), using Chiralpak columns and guard columns. ESI mass spectra were obtained on a Waters LCT Premier Instrument. Specific optical rotation measurements were carried out on a Jasco P-1030 polarimeter. Racemic standard products were prepared using the same general procedures but with 10 mol% of DABCO as catalyst in order to establish HPLC conditions.

## 2. Preparation of Morita-Baylis-Hillman acetates 6a-6g

The MBH acetates **6** were prepared according to a procedure described in the literature.<sup>1</sup> In the same reference, **6a** and **6e** are characterized. Spectroscopic data for all the MBH acetates are given below and the corresponding <sup>1</sup>H and <sup>13</sup>C NMR spectra can be found in Section 9.

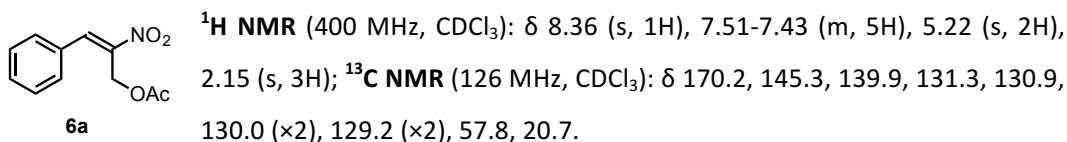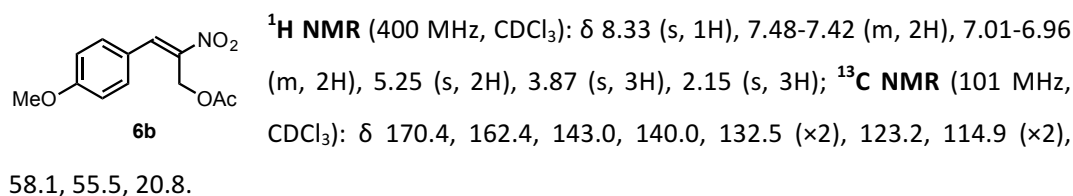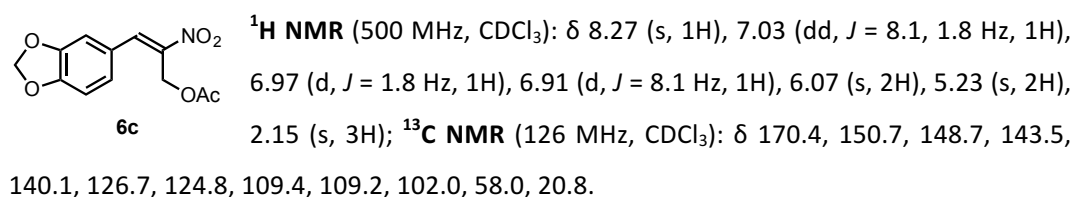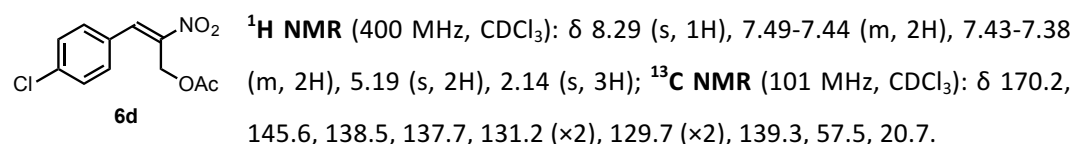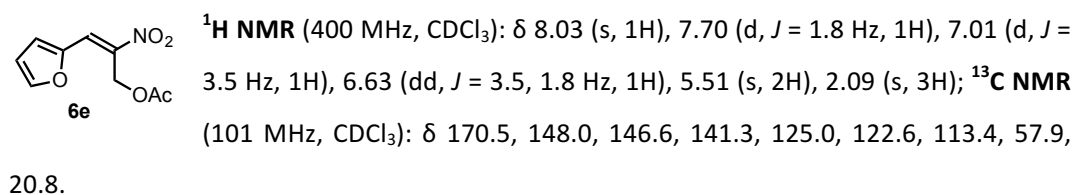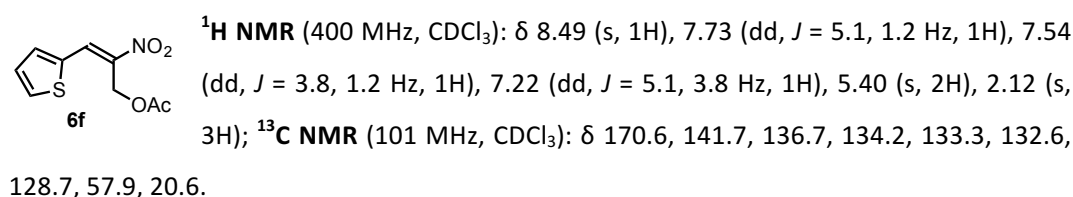

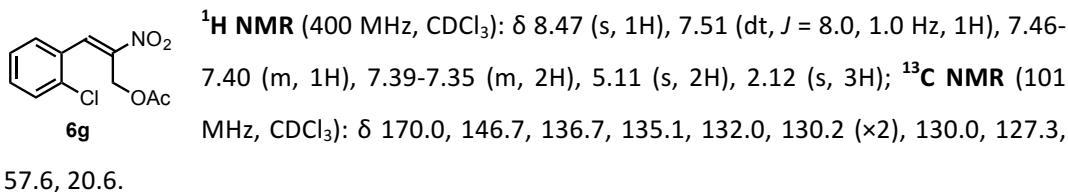

### 3. Preparation of catalytic resins 2-5

#### General synthetic scheme for the preparation of resins 2-4

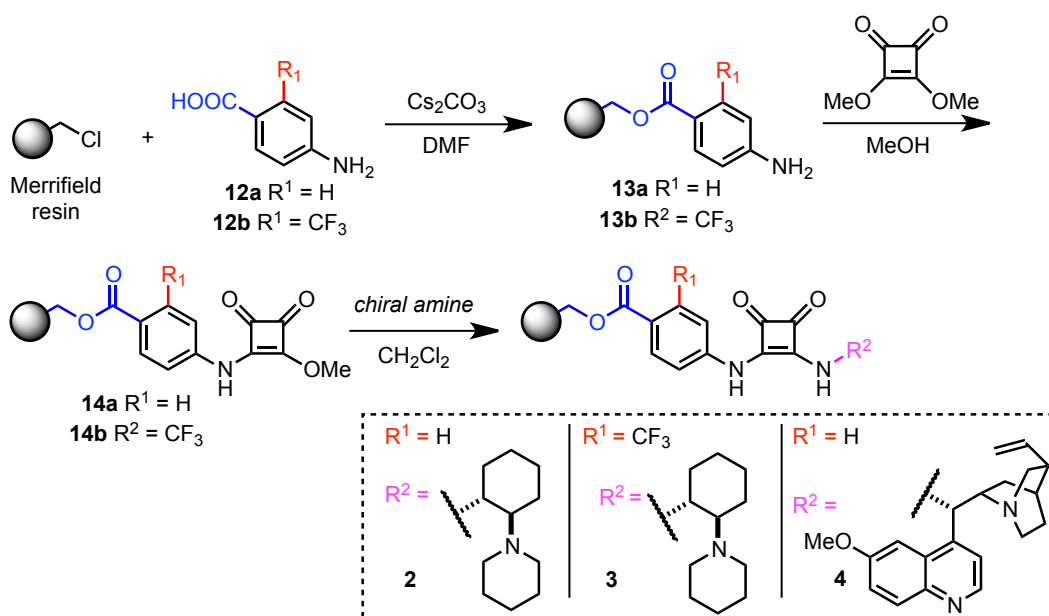

Scheme S1

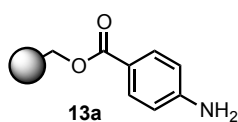

Merrifield resin (Novabiochem, 1% DVB, 0.53 mmol/g of active chlorine, 0.50 g) was charged in a screw cap Schlenk flask and was suspended in 3.3 mL of dry DMF under Ar atmosphere. Then,  $\text{Cs}_2\text{CO}_3$  (0.13 g, 0.40 mmol) and 4-aminobenzoic acid (0.055 g, 0.40 mmol) were added to the previous suspension and the reaction mixture was shaken at rt for 1 h and at 80 °C for 10 more hours. The resulting resin was allowed to cool down to rt, filtered and washed successively with water (60 mL), water/MeOH 1:1 (60 mL), MeOH/ $\text{CH}_2\text{Cl}_2$  1:1 (60 mL) and  $\text{CH}_2\text{Cl}_2$  (60 mL). After drying it overnight under vacuum at 45 °C, 0.50 g of **13a** were isolated.

**N elemental analysis** (%):  $0.72 \pm 0.25$ .

**f**: 0.51 mmol/g (quantitative anchoring,  $f_{\text{max}}$ : 0.48 mmol<sub>monomer</sub>/g<sub>resin</sub>).

**IR** (ATR):  $\nu$  1707  $\text{cm}^{-1}$  (carbonyl band).

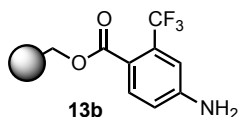

Merrifield resin (Novabiochem, 1% DVB,  $f = 0.53$  mmol/g of active chlorine, 0.55 g) was charged in a screw cap Schlenk flask and was suspended in 3.6 mL of dry DMF under Ar atmosphere. Then,  $\text{Cs}_2\text{CO}_3$  (0.14 g, 0.44 mmol) and 4-amino-2-(trifluoromethyl)benzoic acid (0.090 g, 0.44 mmol) were added to the previous suspension and the reaction mixture was shaken for 1 h at rt and subsequently at 80 °C for 10 more hours. The resulting resin was allowed to cool down to rt, filtered and washed successively with water (60 mL), water/MeOH 1:1 (60 mL), MeOH/ $\text{CH}_2\text{Cl}_2$  1:1 (60 mL) and  $\text{CH}_2\text{Cl}_2$  (60 mL). After drying it overnight under vacuum at 45 °C, 0.63 g of **13b** were isolated.

**F elemental analysis (%)**:  $2.73 \pm 0.25$ .

$f$ : 0.49 mmol/g (quantitative anchoring,  $f_{\text{max}}$ : 0.46 mmol<sub>monomer</sub>/g<sub>resin</sub>).

**IR (ATR)**:  $\nu$  1728  $\text{cm}^{-1}$  (carbonyl band).

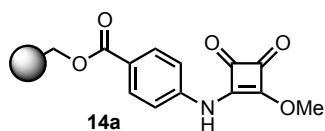

3,4-Dimethoxy-3-cyclobutene-1,2-dione (0.06 g, 0.43 mmol) was added to a suspension of **13a** (0.45 g, 0.23 mmol) in 3.5 mL of MeOH. The reaction mixture was shaken overnight at rt, filtered and washed successively with MeOH (60 mL), MeOH/ $\text{CH}_2\text{Cl}_2$  1:1 (60 mL) and  $\text{CH}_2\text{Cl}_2$  (60 mL). After drying it overnight under vacuum at 45 °C, 0.42 g of **14a** were isolated.

**N elemental analysis (%)**:  $0.69 \pm 0.25$ .

$f$ : 0.49 mmol/g (quantitative anchoring,  $f_{\text{max}}$ : 0.45 mmol<sub>monomer</sub>/g<sub>resin</sub>).

**IR (ATR)**:  $\nu$  1802, 1714  $\text{cm}^{-1}$  (carbonyl bands).

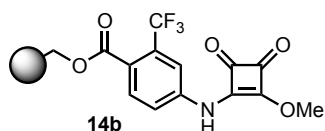

3,4-Dimethoxy-3-cyclobutene-1,2-dione (0.08 g, 0.52 mmol) was added to a suspension of **13b** (0.57 g, 0.26 mmol) in 3.6 mL of MeOH. The reaction mixture was shaken overnight at rt, filtered and washed successively with MeOH (60 mL), MeOH/ $\text{CH}_2\text{Cl}_2$  1:1 (60 mL) and  $\text{CH}_2\text{Cl}_2$  (60 mL). After drying it overnight under vacuum at 45 °C, 0.49 g of **14b** were isolated.

**F elemental analysis (%)**:  $2.60 \pm 0.25$ .

$f$ : 0.46 mmol/g (quantitative anchoring,  $f_{\text{max}}$ : 0.44 mmol<sub>monomer</sub>/g<sub>resin</sub>).

**IR (ATR)**:  $\nu$  1804, 1733  $\text{cm}^{-1}$  (carbonyl bands).

### General procedure for the preparation of resins 2-4 from 14a or 14b

Resins **14a** or **14b** (0.15 mmol) were suspended in 2 mL of CH<sub>2</sub>Cl<sub>2</sub> and then a solution of the corresponding diamine, either (1*R*,2*R*)-*trans*-2-(1-piperidinyl)cyclohexylamine<sup>2</sup> or *epi*-aminoquinine,<sup>3</sup> in CH<sub>2</sub>Cl<sub>2</sub> (0.30 mmol, 0.37 M) was added. The reaction mixture was shaken at rt for 3 days, filtered and washed successively with MeOH (60 mL), MeOH/CH<sub>2</sub>Cl<sub>2</sub> 1:1 (60 mL) and CH<sub>2</sub>Cl<sub>2</sub> (60 mL). Then it was allowed to dry overnight under vacuum at 45 °C.

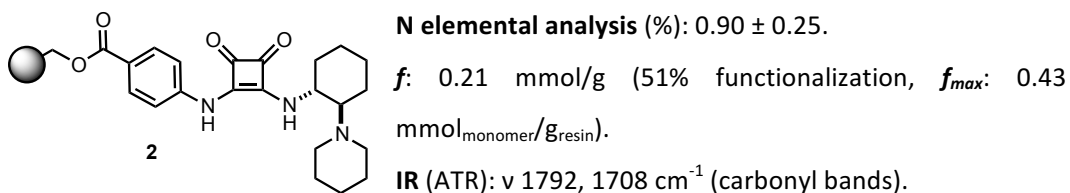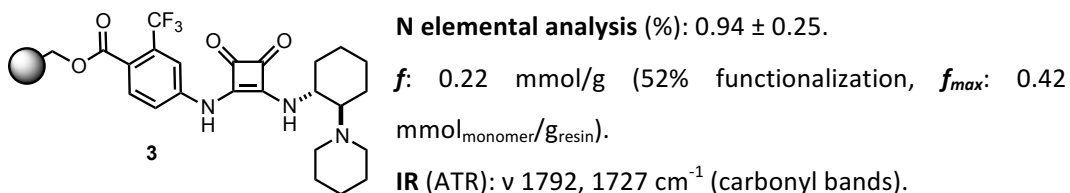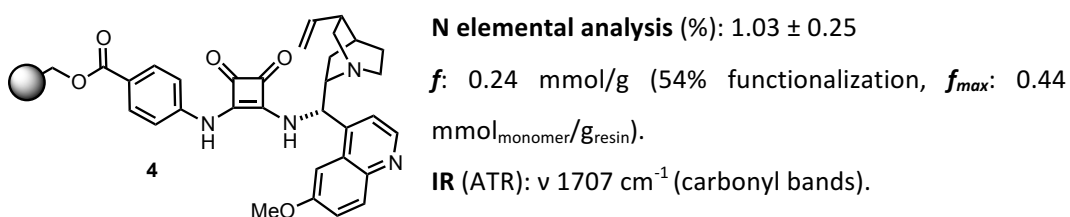

### Synthetic scheme for the preparation of resin 5

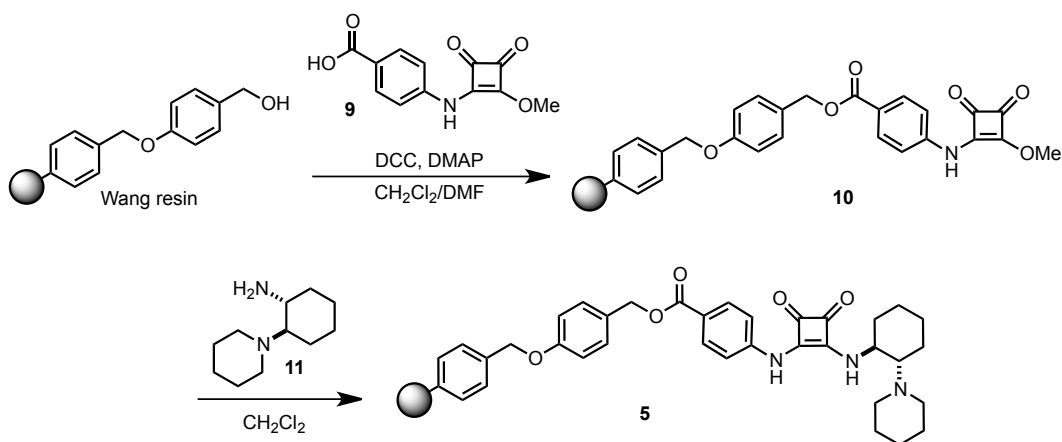

Scheme S2

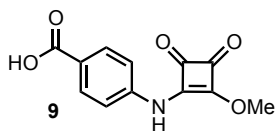

A mixture of 4-aminobenzoic acid (11.6 g, 84.0 mmol) and 3,4-dimethoxy-3-cyclobutene-1,2-dione (12.0 g, 84.0 mmol) was suspended in 184 mL of MeOH and stirred at rt for 3 days. The resulting pale yellow solid was isolated by filtration and used in the next step without any further purification (19.6 g, 79.0 mmol, 94% yield).

<sup>1</sup>H NMR (400 MHz, DMSO-*d*<sub>6</sub>): δ 11.00 (s, 1H), 7.91 (d, *J* = 8.4 Hz, 2H), 7.47 (d, *J* = 8.3 Hz, 2H), 4.41 (s, 3H); <sup>13</sup>C NMR (101 MHz, DMSO-*d*<sub>6</sub>): δ 188.1, 184.9, 180.0, 169.6, 167.2, 142.45, 131.1 (×2), 126.1, 119.2 (×2), 61.2; IR (ATR): ν 3247, 3190, 3098, 2969, 1799, 1709, 1675, 1607, 1569, 1374, 1280 cm<sup>-1</sup>; mp: 282-285 °C; HRMS (ESI<sup>-</sup>): *m/z* calcd. for C<sub>12</sub>H<sub>8</sub>NO<sub>5</sub> [M-H]<sup>-</sup>: 246.0408, found: 246.0404.

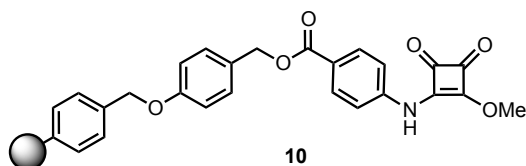

The Wang resin (Iris Biotech, *f* = 1.2 mmol/g, 5 g) and DMAP (0.15 g, 1.2 mmol) were suspended in 40 mL of dry CH<sub>2</sub>Cl<sub>2</sub> and a solution of **9** (1.79 g, 7.2 mmol) in 10 mL of dry DMF was added under N<sub>2</sub> atmosphere. The mixture was cooled to 0 °C and a solution of dicyclohexylcarbodiimide (DCC, 1.86 g, 9.0 mmol) in 10 mL of dry DMF was added. It was allowed to slowly reach rt and shaken overnight. Then, the resin was filtered and washed with DMF (100 mL), DMF/H<sub>2</sub>O 1:1 (200 mL), H<sub>2</sub>O (100 mL), H<sub>2</sub>O/MeOH 1:1 (200 mL), MeOH (200 mL), MeOH/CH<sub>2</sub>Cl<sub>2</sub> 1:1 (200 mL) and CH<sub>2</sub>Cl<sub>2</sub> (200 mL) and dried under vacuum at 45 °C. After this, 5.75 g of a deep orange resin were obtained.

**N elemental analysis (%)**: 1.30 ± 0.25.

**f**: 0.94 mmol/g (quantitative anchoring, **f**<sub>max</sub>: 0.93 mmol<sub>monomer</sub>/g<sub>resin</sub>).

**IR (ATR)**: ν 1802, 1715 cm<sup>-1</sup> (carbonyl bands).

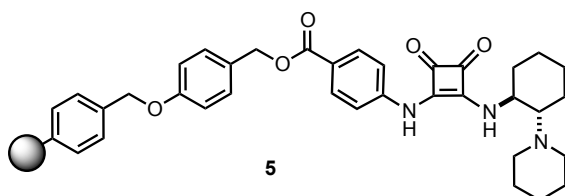

Resin **10** (2.3 g, 2.1 mmol) was swollen in 14 mL of CH<sub>2</sub>Cl<sub>2</sub> and (1*R*,2*R*)-*trans*-2-(1-piperidinyl)cyclohexylamine<sup>2</sup> (0.78 g, 4.3 mmol), dissolved in 4 mL of CH<sub>2</sub>Cl<sub>2</sub>, was added. It was shaken at rt for two days. Then, it was filtered and washed with CH<sub>2</sub>Cl<sub>2</sub> (150 mL), CH<sub>2</sub>Cl<sub>2</sub>/MeOH 1:1 (150 mL), MeOH (120 mL), CH<sub>2</sub>Cl<sub>2</sub>/MeOH 1:1 (120 mL) and CH<sub>2</sub>Cl<sub>2</sub> (150 mL) and dried under vacuum at 45 °C. After this, 2.4 g of a yellow resin were obtained.

**N elemental analysis (%)**: 2.45 ± 0.25.

**f**: 0.58 mmol/g (72% functionalization, **f<sub>max</sub>**: 0.82 mmol<sub>monomer</sub>/g<sub>resin</sub>).

**IR (ATR)**:  $\nu$  1792, 1710 cm<sup>-1</sup> (carbonyl bands).

#### 4. General procedure for the synthesis of 8a in batch

PS-squaramide **5** (5.5 mg, 3.2  $\mu$ mol) was charged in a vial and it was swollen with 0.25 mL of solvent. Subsequently, (*E*)-2-nitro-phenylallyl acetate (**6a**, 14 mg, 0.06 mmol) and hydroxynaphthoquinone (12 mg, 0.07 mmol) were added to the suspension and the reaction mixture was shaken at rt until total consumption of the starting nitroacetate **6a** (TLC monitoring). Then, the resin was filtered and washed with the specific solvent. After this, 0.5 mL of aqueous NaHCO<sub>3</sub> (sat) solution were added to the filtrate and the biphasic mixture was stirred for 1 h. The phases were then separated and the aqueous layer was washed with CH<sub>2</sub>Cl<sub>2</sub> twice. The combined organic extracts were dried over Na<sub>2</sub>SO<sub>4</sub>, filtered and evaporated under vacuum to dryness. The crude was finally purified by silica gel column chromatography (cyclohexane/EtOAc 80:20) to give a yellow solid.

#### Screening of solvents

| Solvent                         | Reaction time | Yield | dr    | ee  |
|---------------------------------|---------------|-------|-------|-----|
| CH <sub>2</sub> Cl <sub>2</sub> | 1 h           | 87%   | >95:5 | 98% |
| CHCl <sub>3</sub>               | 1 h           | 90%   | 91:9  | 92% |
| DCE                             | 1.5 h         | 73%   | >95:5 | 98% |
| dioxane                         | 2 h           | 67%   | 90:10 | 90% |
| toluene                         | 5 h           | 77%   | 91:9  | 82% |
| THF                             | 3 h           | 88%   | >95:5 | 96% |
| EtOAc                           | 3 h           | 89%   | 92:8  | 97% |

Table S1



## 5. Optimization of the cyclization reaction in flow

A solution of Michael adduct **7a** in a 9:1 mixture of CH<sub>2</sub>Cl<sub>2</sub>/THF (0.1 M, flow 1 = 0.2 mL/min; HPLC pump AZURA P 4.1S from KNAUER) and the solution of aqueous base (flow 2; syringe pump Legato 200 from KDSCIENTIFIC) were mixed in a T-junction (PTFE). The reaction mixture was circulated through the coil ( $\varnothing$  = 0.8 mm, 10 mL, PTFE) at rt. The solution with the starting material was pumped for 2 min. After this time, the 3-position valve was switched to the reservoir of solvent (CH<sub>2</sub>Cl<sub>2</sub>/THF 9:1; Scheme S3) and it was passed through the system at equal flow rate. The organic phase at the outlet of the liquid-liquid separator was collected and evaporated under reduced pressure. Conversion was determined by <sup>1</sup>H NMR. Subsequently, new conditions were tested utilizing the same procedure (Table S2 and Table 3 main text).

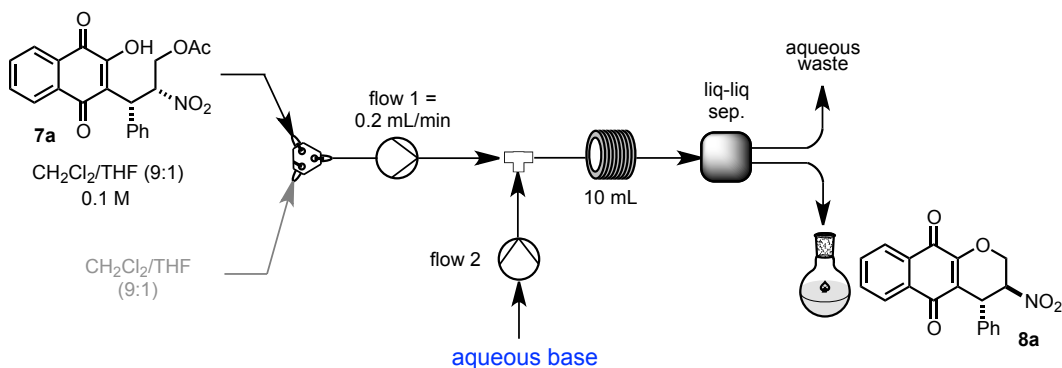

Scheme S3

### Screening of basic aqueous solutions for the cyclization reaction

| Aqueous base                                                           | Flow 2 (mL/min) | Conversion | Notes                                                             |
|------------------------------------------------------------------------|-----------------|------------|-------------------------------------------------------------------|
| NaHCO <sub>3</sub>                                                     | 0.45            | 100%       | –                                                                 |
| Na <sub>2</sub> CO <sub>3</sub>                                        | 0.3             | 100%       | A precipitate is formed.                                          |
| Na <sub>2</sub> CO <sub>3</sub> /NaHCO <sub>3</sub><br>buffer pH = 9.3 | 0.3             | 13%        | –                                                                 |
| Na <sub>3</sub> PO <sub>4</sub> (0.3 M)                                | 0.3             | 100%       | Only deprotonation (aqueous phase), no cyclized product observed. |
| Tris buffer pH = 8                                                     | 0.3             | 50%        | –                                                                 |
| Na <sub>2</sub> HPO <sub>4</sub> (0.35 M)                              | 0.4             | 80%        | –                                                                 |

Table S2

## 6. Preparation of the library of enantioenriched pyranonaphthoquinones in flow (GP1)

Catalyst **5** (400 mg, 0.23 mmol) was introduced in a PTFE column ( $\varnothing = 3.9$  mm diameter) and this was connected to the flow set-up depicted in Scheme S4. Then, the resin was swollen by circulating a mixture of  $\text{CH}_2\text{Cl}_2/\text{THF}$  9:1 (HPLC pump AZURA P 4.1S from KNAUER).

Solutions containing hydroxynaphthoquinone (1.1 mmol, 1.1 equiv.) and the corresponding nitroalkene (1 mmol, 1.0 equiv.) in  $\text{CH}_2\text{Cl}_2$  (9 mL) and THF (1 mL) were sequentially circulated through the column (0.2 mL/min, syringe pump Legato 200 from KDSCIENTIFIC equipped with a gastight syringe from Hamilton, ca. 50 min for each run). A solution of sat. aq.  $\text{NaHCO}_3$  was circulated downstream of the column to carry out the cyclization step in a 10-mL coil (0.45 mL/min, syringe pump as above equipped with plastic syringes). At the end, the biphasic mixture was separated with the aid of a liquid-liquid separator.

When each combination of reagents was consumed, the system was rinsed with the solvent mixture for 1 h (0.2 mL/min) to ensure all organic materials were collected before the next combination was introduced in the flow set-up.

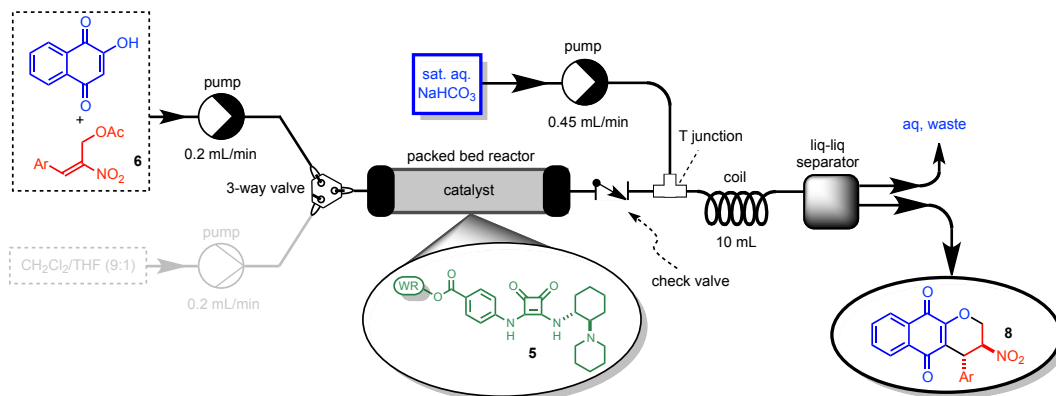

Scheme S4

## 7. Stereochemical model to account for the observed selectivity

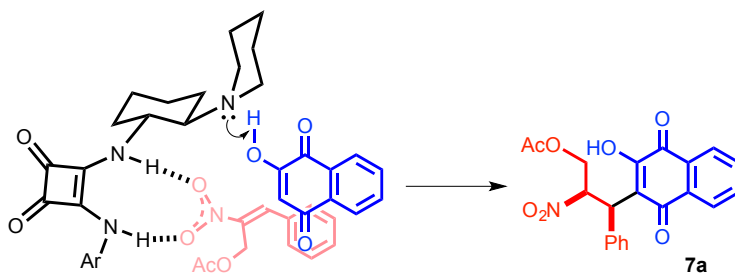

## 8. Characterization of 7a

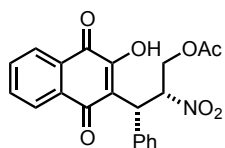

Orange foam;  $^1\text{H NMR}$  (400 MHz,  $\text{CDCl}_3$ ):  $\delta$  8.10 (dd,  $J = 7.8, 1.3$  Hz, 1H), 8.01 (dd,  $J = 7.6, 1.3$  Hz, 1H), 7.90 (br s, 1H), 7.74 (td,  $J = 7.6, 1.3$  Hz, 1H), 7.65 (td,  $J = 7.6, 1.3$  Hz, 1H), 7.57-7.53 (m, 2H), 7.35-7.30 (m, 2H), 7.29-7.24 (m, 1H), 6.30 (ddd,  $J = 12.0, 8.5, 2.9$  Hz, 1H), 5.09 (d,  $J = 12.0$  Hz, 1H), 4.47 (dd,  $J = 12.3, 2.9$  Hz, 1H), 4.30 (dd,  $J = 12.3, 8.5$  Hz, 1H), 2.06 (s, 3H);  $^{13}\text{C NMR}$  (126 MHz,  $\text{CDCl}_3$ ):  $\delta$  188.3, 180.9, 170.0, 153.1, 136.1, 135.4, 133.3, 132.5, 129.3 ( $\times 2$ ), 128.9 ( $\times 2$ ), 128.8, 128.3, 127.2, 126.2, 120.0, 85.8, 63.6, 42.2, 20.5;  $[\alpha]_D^{25}$ : +23.4 ( $c$  1.12,  $\text{CHCl}_3$ ); **HRMS** (ESI+):  $m/z$  calcd. for  $\text{C}_{21}\text{H}_{17}\text{NNaO}_7$   $[\text{M}+\text{Na}]^+$ : 418.0897, found: 418.0904; **IR** (ATR):  $\nu$  1750, 1672, 1649, 1594, 1556, 1459, 1370, 1227  $\text{cm}^{-1}$ ; **HPLC** (Daicel Chiralpak IA column,  $\text{Hex}/\text{CH}_2\text{Cl}_2/\text{EtOH}/\text{TFA}$  90:5:5:0.1; flow rate 1.0 mL/min,  $\lambda = 254$  nm):  $t_R(\text{maj}) = 20.0$  min;  $t_R(\text{min}) = 32.6$  min.

The relative configuration of **7a** was determined by X-ray diffraction:

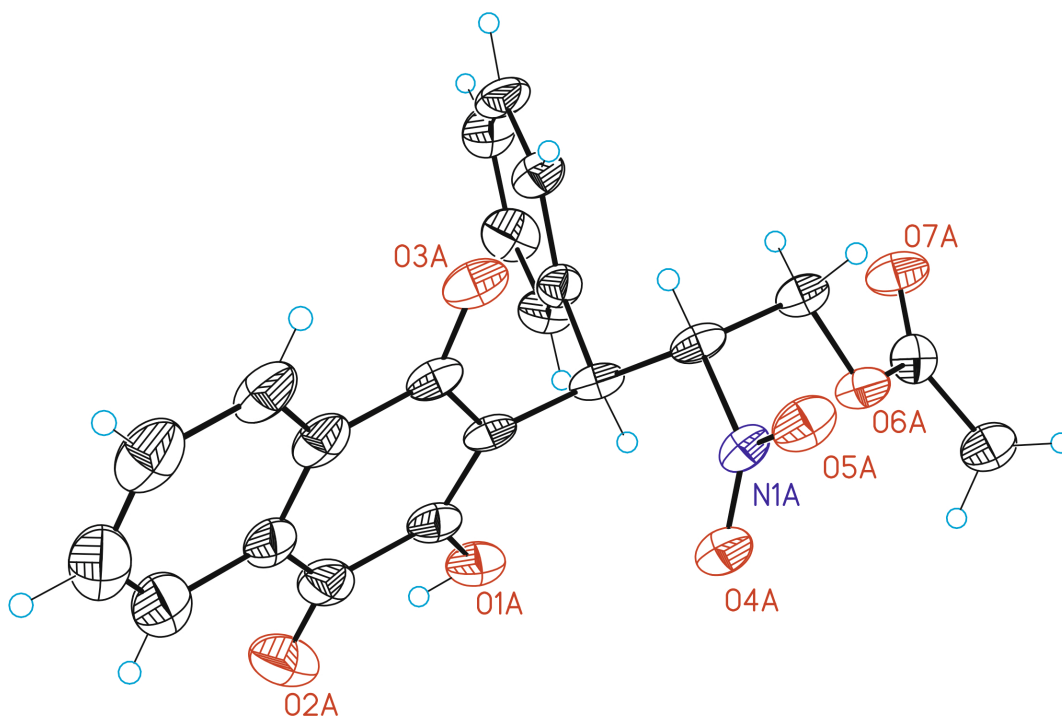

The corresponding CIF file has been deposited with the CCDC and has reference number 1456999.

## 9. Characterization of compounds 8a-8g

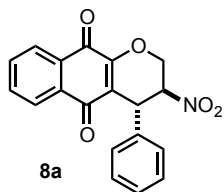

Compound **8a** was prepared in flow from hydroxynaphthoquinone (0.192 g, 1.1 mmol) and nitroalkene **6a** (0.221 g, 1.0 mmol) according to the General Procedure *GP1*. The desired product was obtained after flash chromatography on silica gel (cyclohexane/EtOAc, 90:10 to 70:30) in 71% yield (0.237 g, 0.71 mmol), 87:13 dr and 98% ee.

$^1\text{H}$  and  $^{13}\text{C}$  NMR data match with those reported in the literature.<sup>4</sup> **HPLC** (Daicel Chiralpak IC column, hexane/*i*-PrOH (75:25), flow rate 1.0 mL/min,  $\lambda = 254$  nm):  $t_{\text{major}} = 20.0$  min;  $t_{\text{minor}} = 15.5$  min.

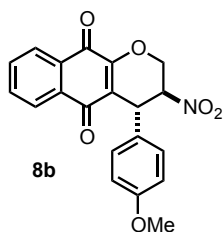

Compound **8b** was prepared in flow from hydroxynaphthoquinone (0.192 g, 1.1 mmol) and nitroalkene **6b** (0.251 g, 1.0 mmol) according to the General Procedure *GP1*. The desired product was obtained after flash chromatography on silica gel (cyclohexane/EtOAc, 90:10 to 70:30) in 83% yield (0.300 g, 0.83 mmol), 85:15 dr and 97% ee.

$^1\text{H}$  and  $^{13}\text{C}$  NMR data match with those reported in the literature.<sup>4</sup> **HPLC** (Daicel Chiralpak IA column, hexane/*i*-PrOH (70:30), flow rate 1.0 mL/min,  $\lambda = 254$  nm):  $t_{\text{major}} = 51.2$  min;  $t_{\text{minor}} = 10.0$  min.

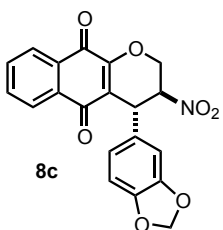

Compound **8c** was prepared in flow from hydroxynaphthoquinone (0.163 g, 0.94 mmol) and nitroalkene **6c** (0.225 g, 0.85 mmol) according to the General Procedure *GP1*. The desired product was obtained after flash chromatography on silica gel (cyclohexane/EtOAc, 90:10 to 70:30) in 74% yield (0.239 g, 0.63 mmol), 87:13 dr and 97% ee.

$^1\text{H}$  and  $^{13}\text{C}$  NMR data match with those reported in the literature.<sup>4</sup> **HPLC** (Daicel Chiralpak IA column, hexane/*i*-PrOH (70:30), flow rate 1.0 mL/min,  $\lambda = 254$  nm):  $t_{\text{major}} = 52.9$  min;  $t_{\text{minor}} = 12.3$  min.

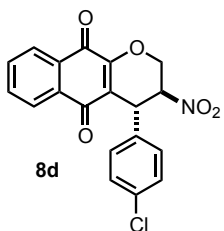

Compound **8d** was prepared in flow from hydroxynaphthoquinone (0.176 g, 1.01 mmol) and nitroalkene **6d** (0.235 g, 0.92 mmol) according to the General Procedure *GP1*. The desired product was obtained after flash chromatography on silica gel (cyclohexane/EtOAc, 90:10 to 70:30) in 80% yield (0.273 g, 0.74 mmol), 92:8 dr and 96% ee.

$^1\text{H}$  and  $^{13}\text{C}$  NMR data match with those reported in the literature.<sup>4</sup> **HPLC** (Daicel Chiralpak IA column, hexane/*i*-PrOH (70:30), flow rate 1.0 mL/min,  $\lambda = 254$  nm):  $t_{\text{major}} = 46.1$  min;  $t_{\text{minor}} = 9.1$  min.

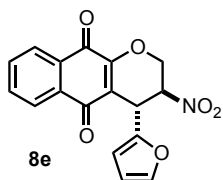

Compound **8e** was prepared in flow from hydroxynaphthoquinone (0.192 g, 1.1 mmol) and nitroalkene **6e** (0.211 g, 1.0 mmol) according to the General Procedure *GP1*. The desired product was obtained after flash chromatography on silica gel (cyclohexane/EtOAc, 90:10 to 70:30) in 62% yield (0.203 g, 0.62 mmol), 84:16 dr and 97% ee.

$^1\text{H}$  and  $^{13}\text{C}$  NMR data match with those reported in the literature.<sup>4</sup>  $[\alpha]_{\text{D}}^{25}$ : +103 (*c* 1.00,  $\text{CHCl}_3$ ); **HPLC** (Daicel Chiralpak IA column, hexane/*i*-PrOH (70:30), flow rate 1.0 mL/min,  $\lambda = 254$  nm):  $t_{\text{major}} = 19.5$  min;  $t_{\text{minor}} = 8.1$  min.

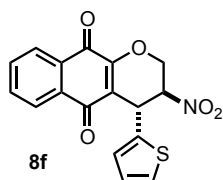

Compound **8f** was prepared in flow from hydroxynaphthoquinone (0.192 g, 1.1 mmol) and nitroalkene **6f** (0.227 g, 1.0 mmol) according to the General Procedure *GP1*. The desired product was obtained after flash chromatography on silica gel (cyclohexane/EtOAc, 90:10 to 70:30) in 65% yield (0.223 g, 0.65 mmol), 78:22 dr and 98% ee.

$^1\text{H}$  and  $^{13}\text{C}$  NMR data match with those reported in the literature.<sup>4</sup> **HPLC** (Daicel Chiralpak IA column, hexane/*i*-PrOH (70:30), flow rate 1.0 mL/min,  $\lambda = 254$  nm):  $t_{\text{major}} = 31.7$  min;  $t_{\text{minor}} = 8.9$  min.

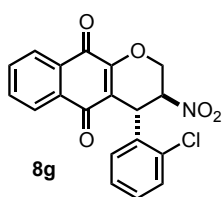

Compound **8g** was prepared in flow from hydroxynaphthoquinone (0.192 g, 1.1 mmol) and nitroalkene **6g** (0.256 g, 1.0 mmol) according to the General Procedure *GP1*. The desired product was obtained after flash chromatography on silica gel (cyclohexane/EtOAc, 90:10 to 70:30) in 81% yield (0.299 g, 0.81 mmol), >99:1 dr and 98% ee.

$^1\text{H}$  and  $^{13}\text{C}$  NMR data match with those reported in the literature.<sup>4</sup> **HPLC** (Daicel Chiralpak IA column, hexane/*i*-PrOH (70:30), flow rate 1.0 mL/min,  $\lambda = 254$  nm):  $t_{\text{major}} = 30.8$  min;  $t_{\text{minor}} = 8.8$  min.

- 
1. C.-L. Cao, Y.-Y. Zhou, J. Zhou, X.-L. Sun, Y. Tang, Y.-X. Li, G.-Y. Li and J. Sun, *Chem. Eur. J.*, 2009, **15**, 11384-11389.
  2. Y. Zhu, J. P. Malerich and V. H. Rawal, *Angew. Chem., Int. Ed.*, 2010, **49**, 153-156.
  3. C. Cassani, R. Martín-Rapún, E. Arceo, F. Bravo and P. Melchiorre, *Nat. Protocols*, 2013, **8**, 325-344.
  4. D. K. Nair, R. F. S. Menna-Barreto, E. N. da Silva Junior, S. M. Mobin and I. N. N. Namboothiri, *Chem. Commun.*, 2014, **50**, 6973-6976.

## 10. $^1\text{H}$ and $^{13}\text{C}$ NMR spectra

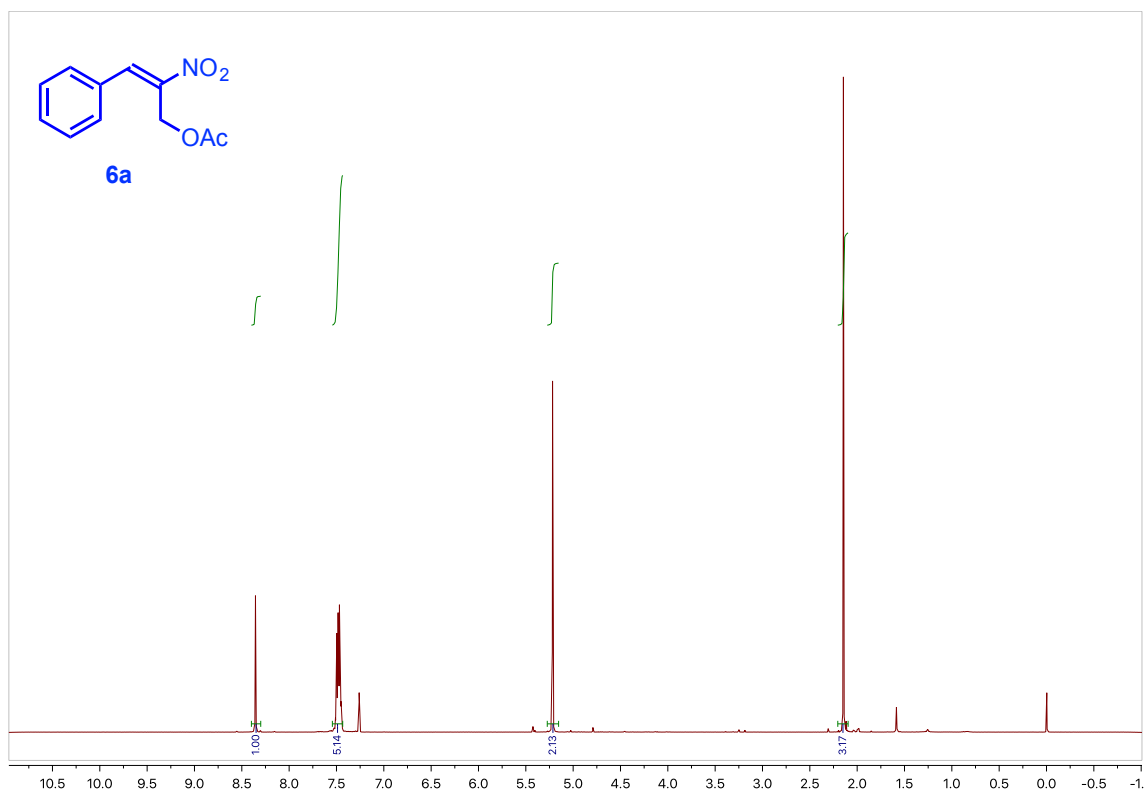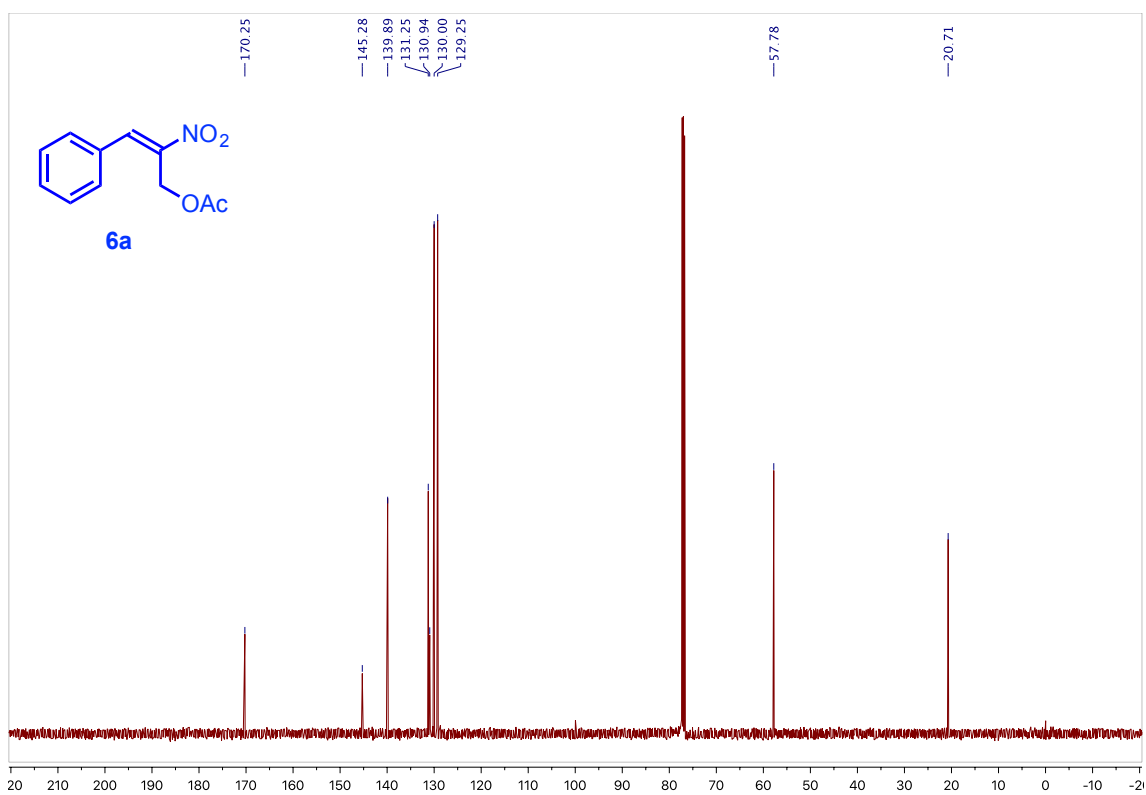

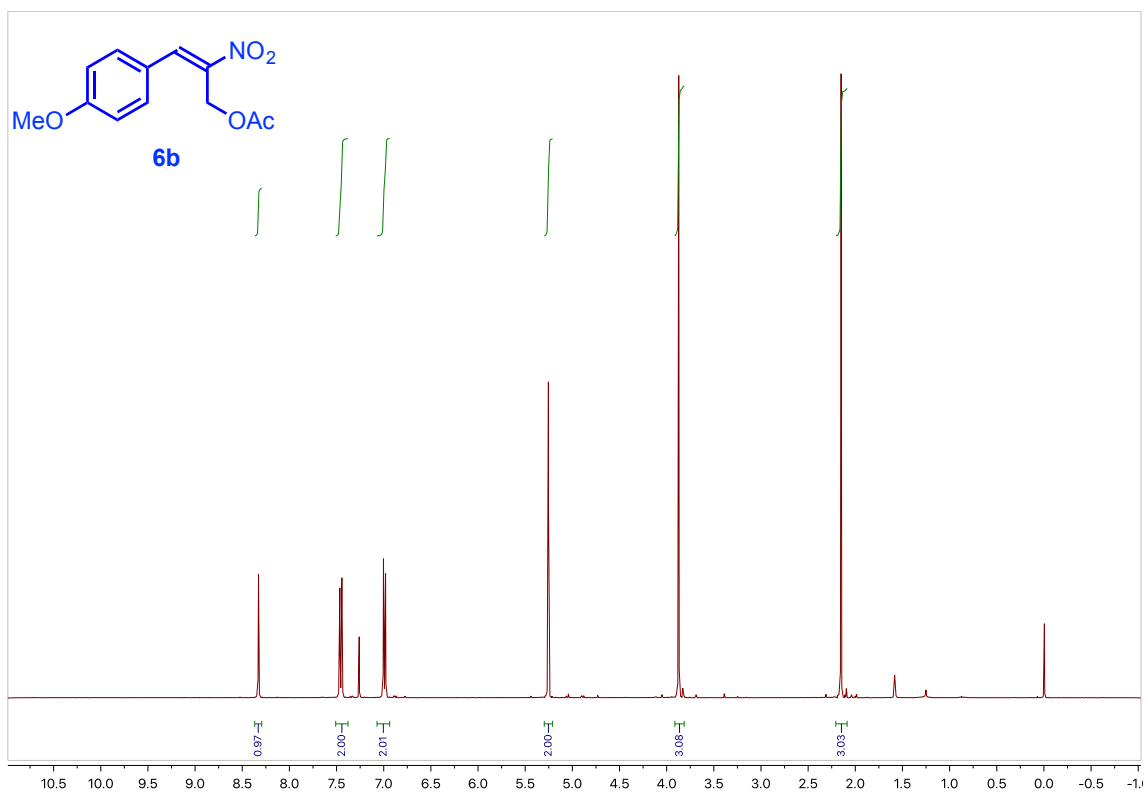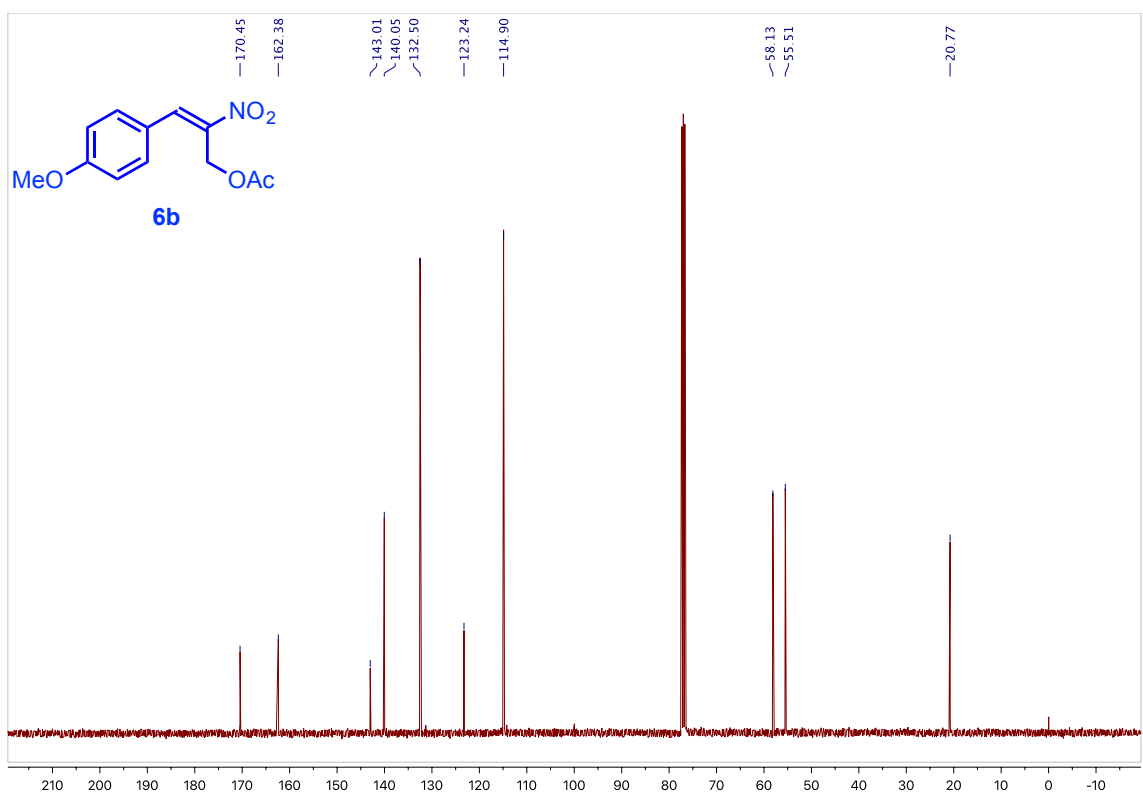

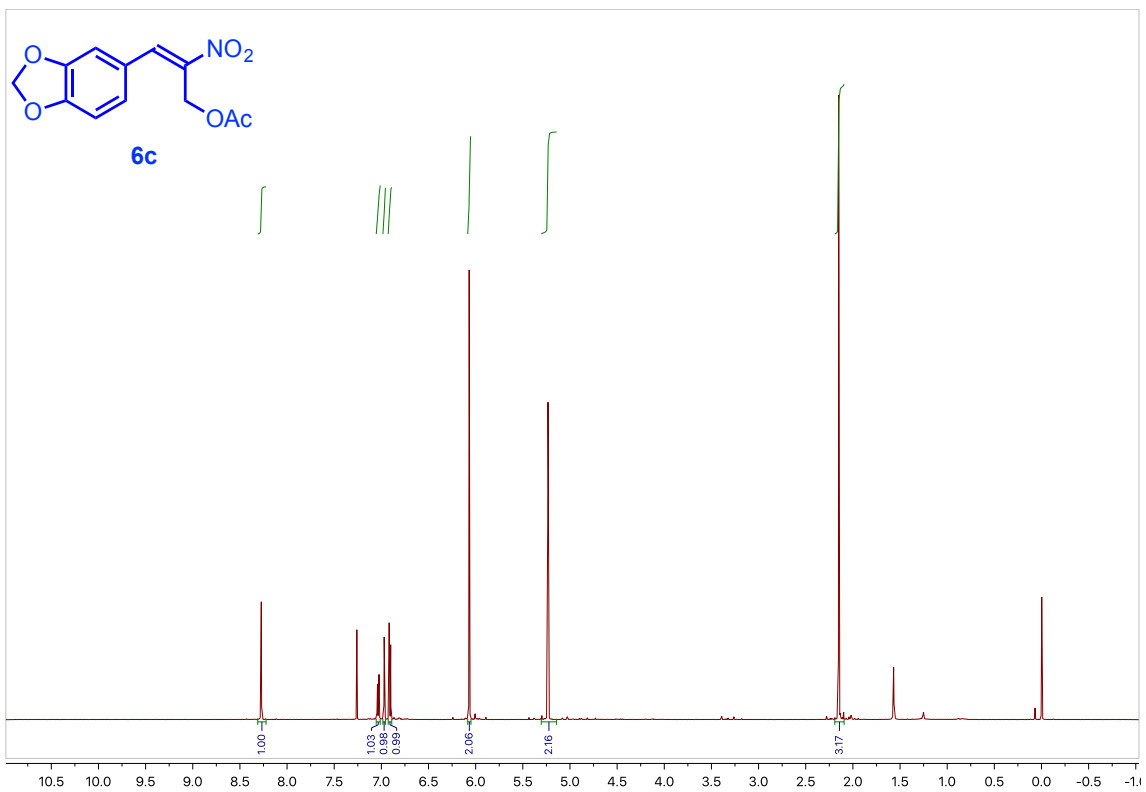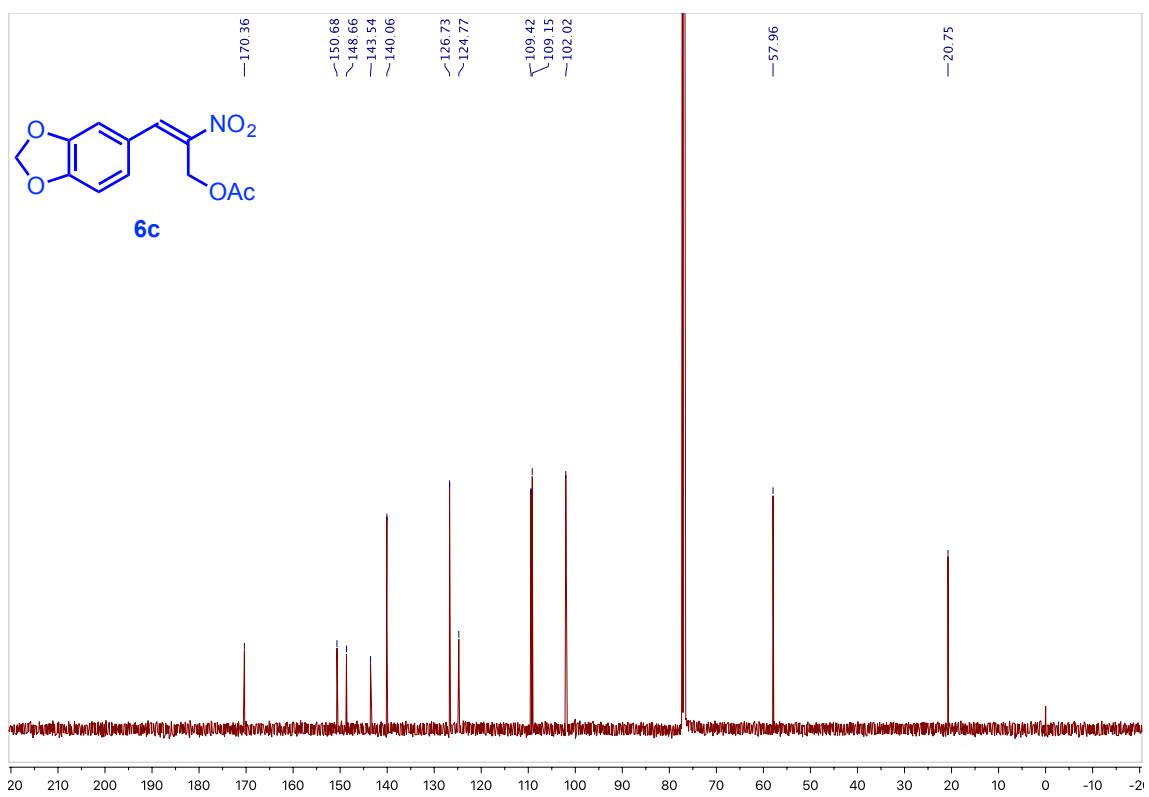



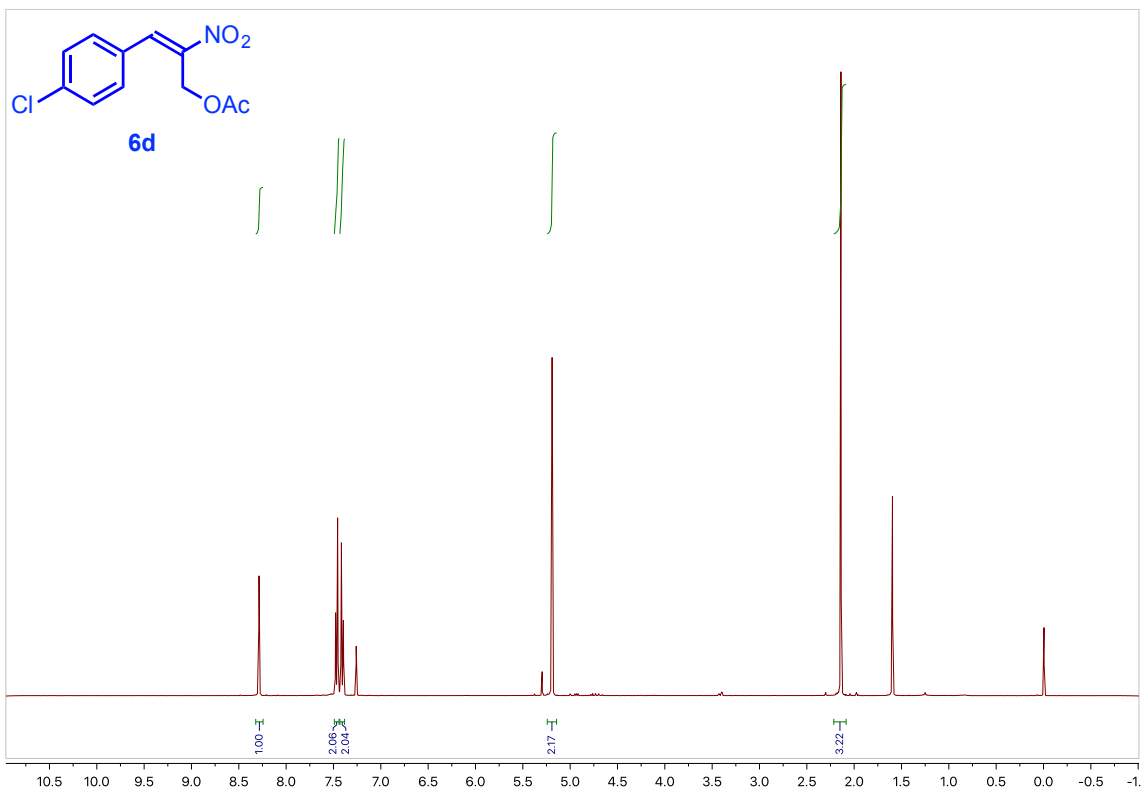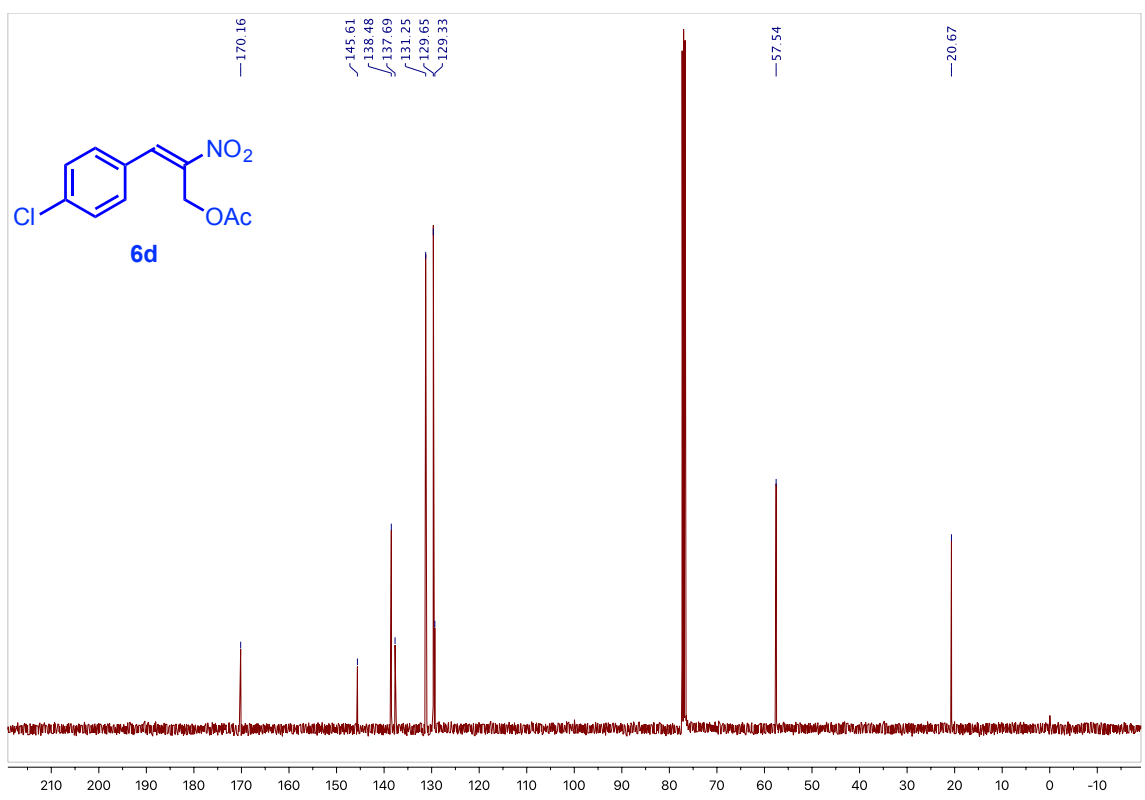

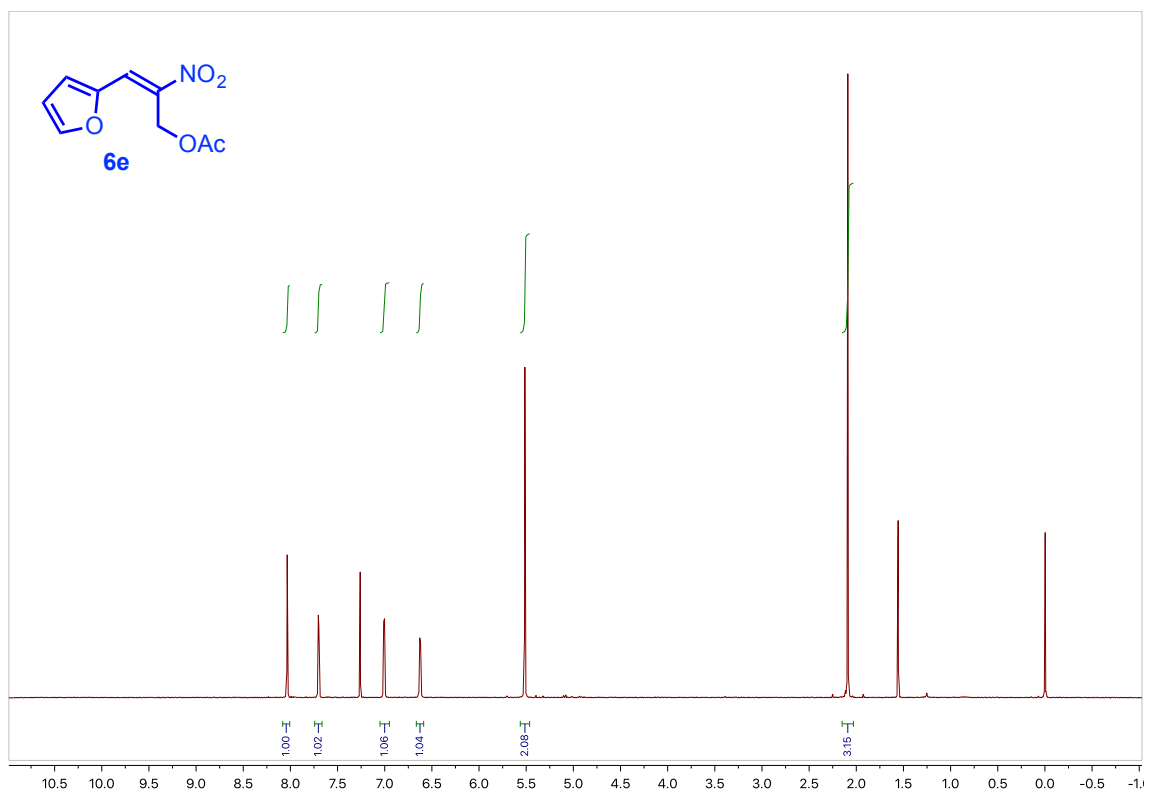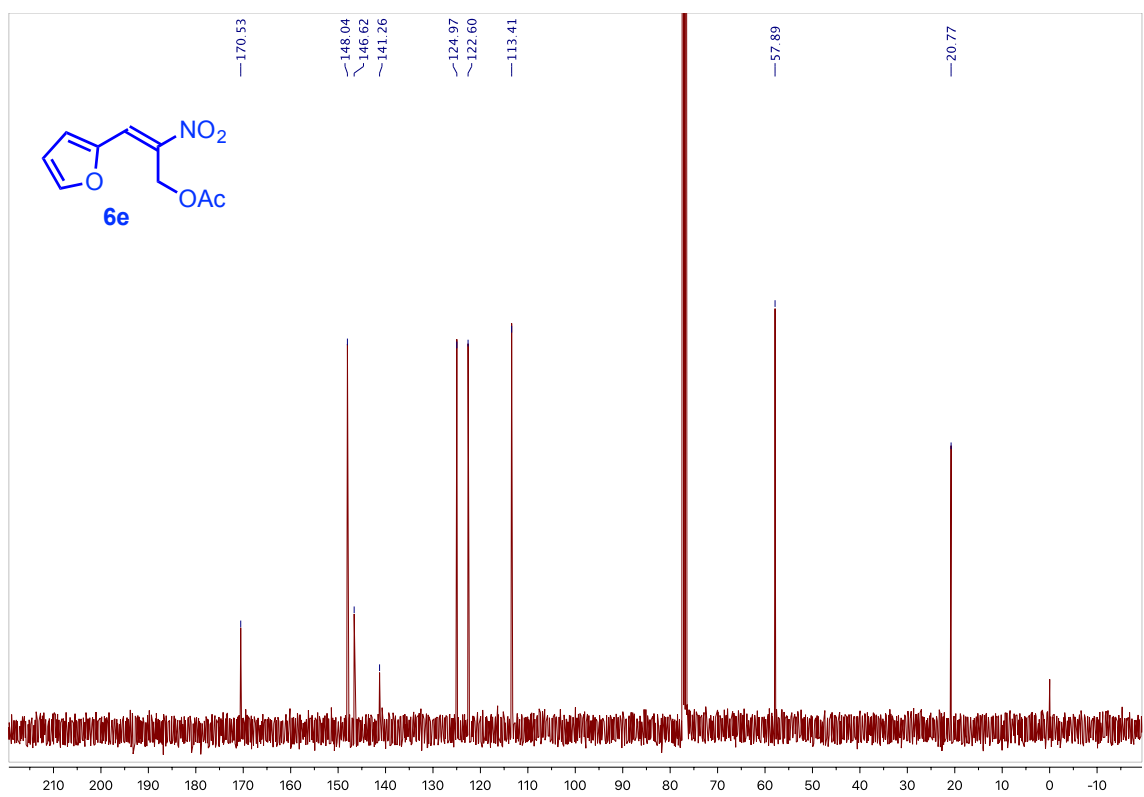

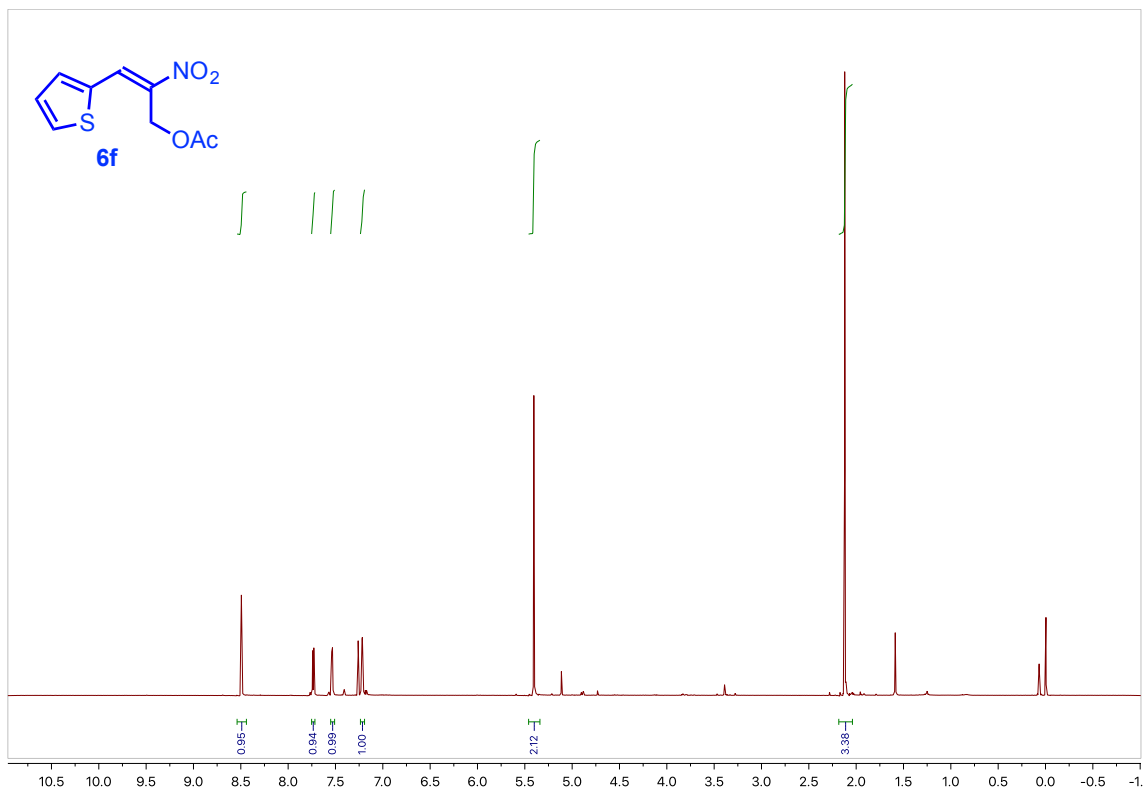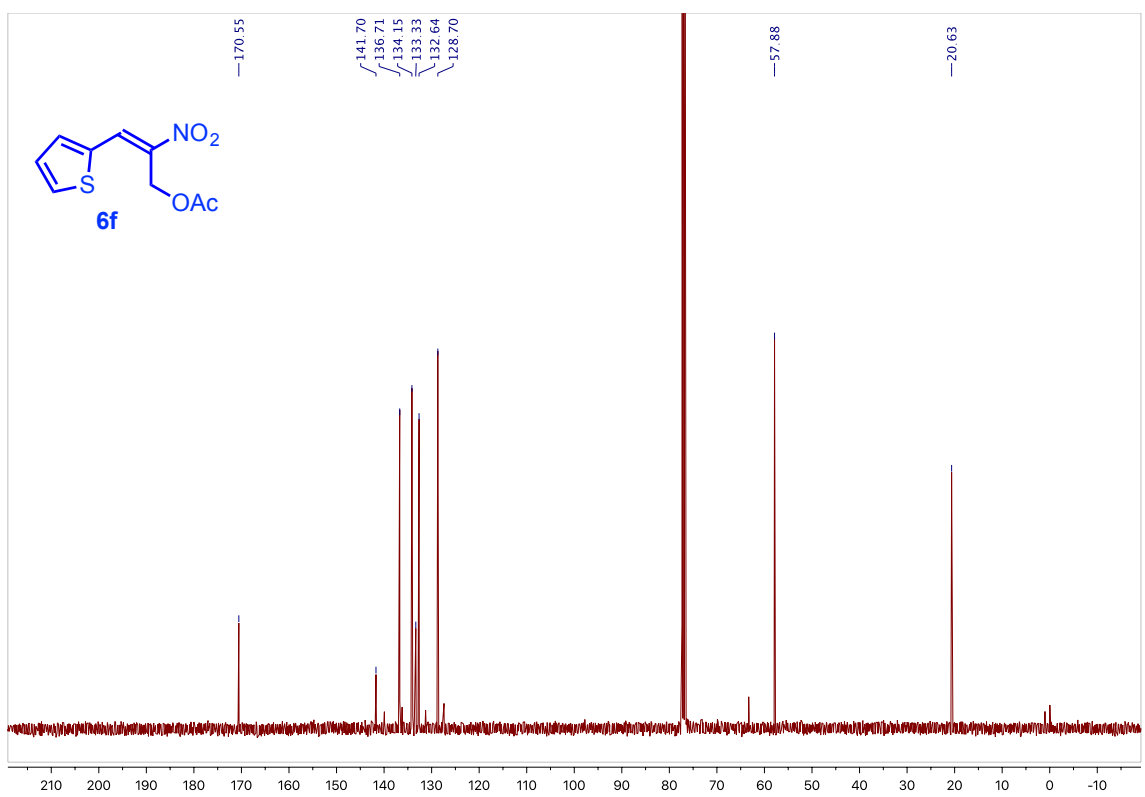

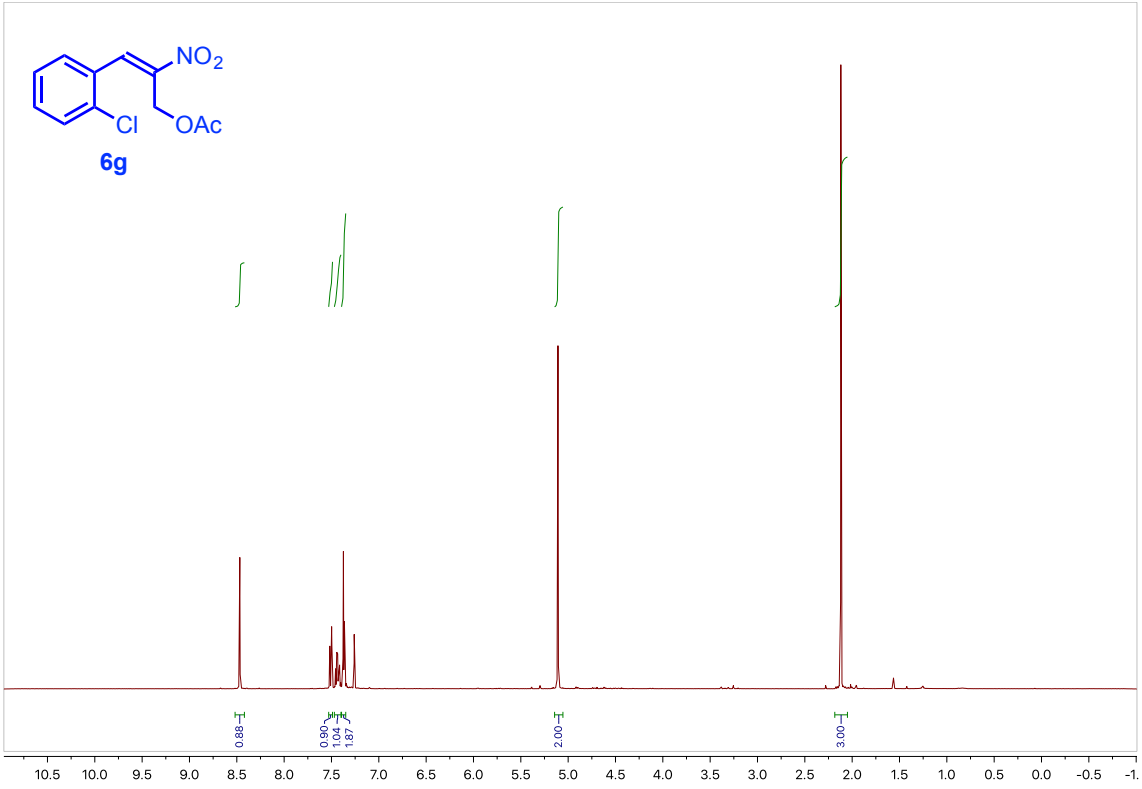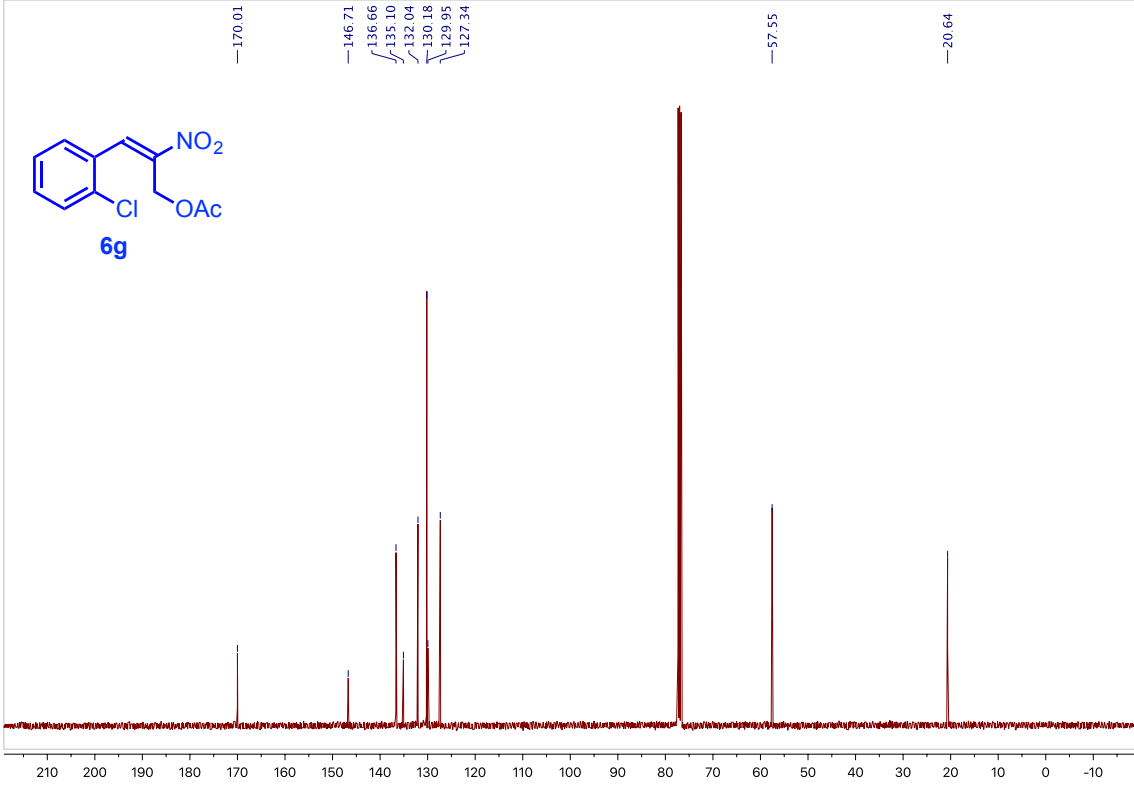

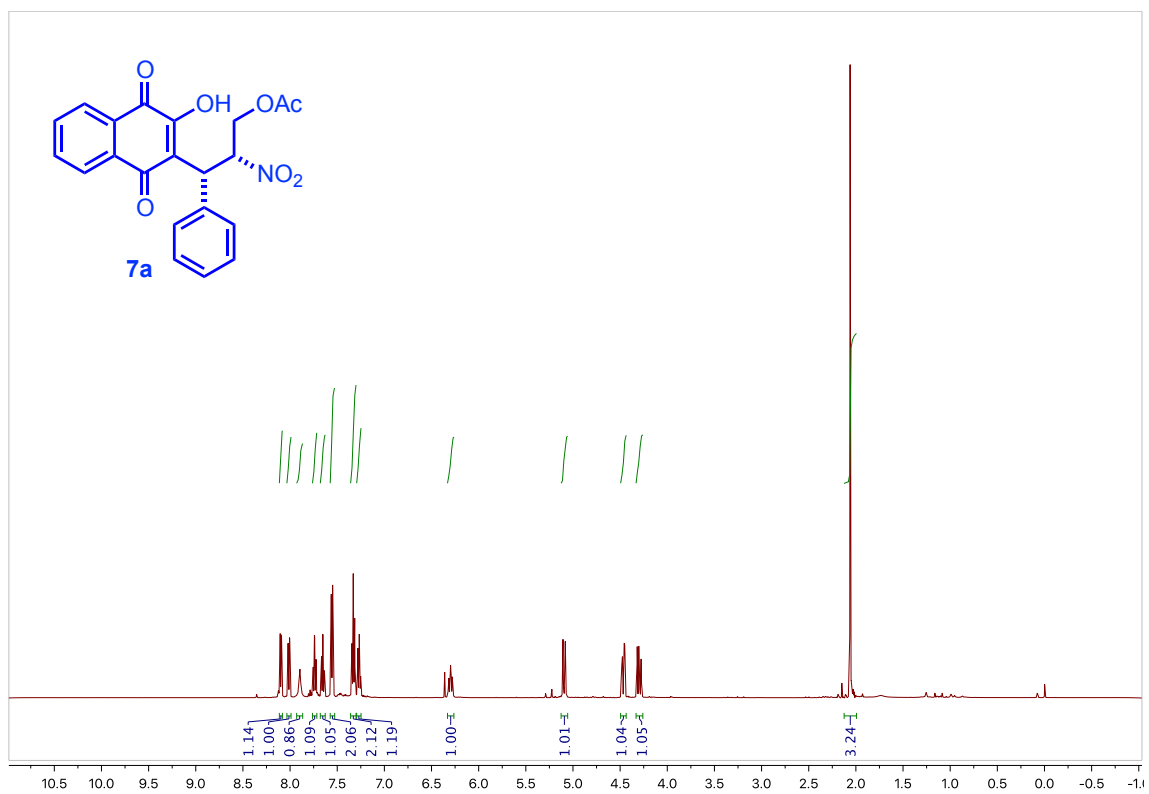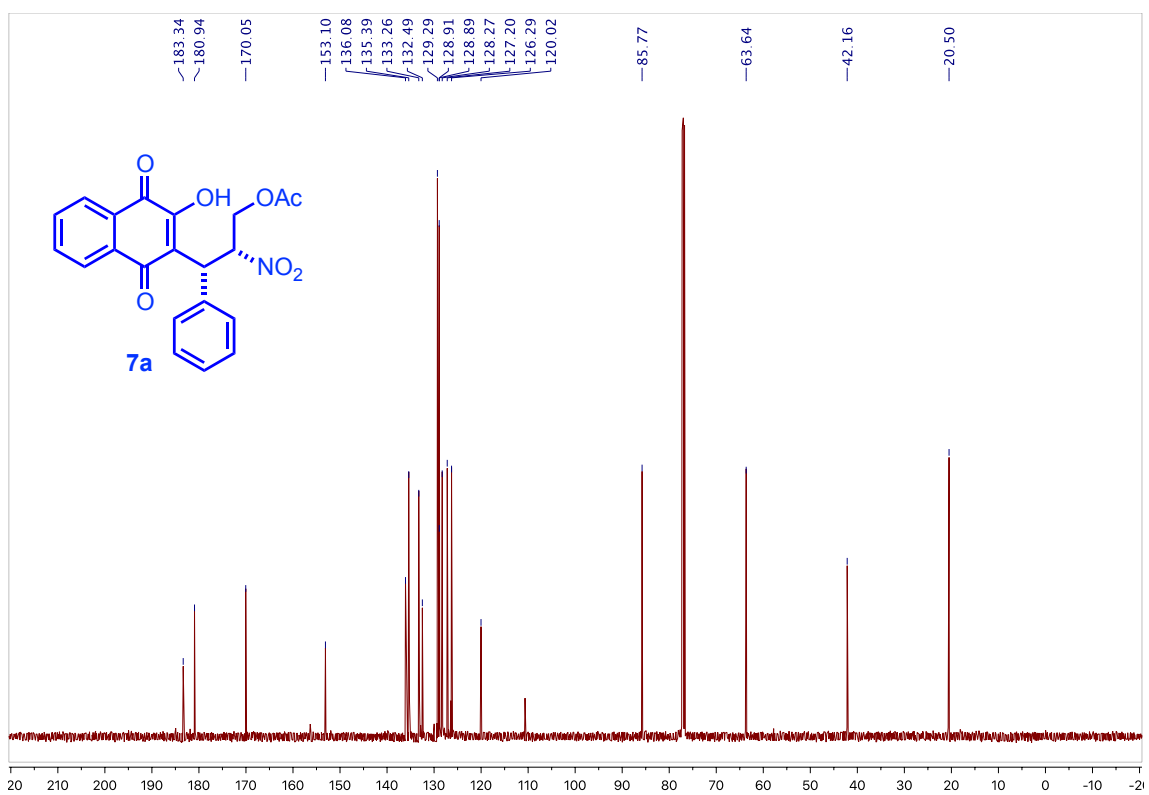

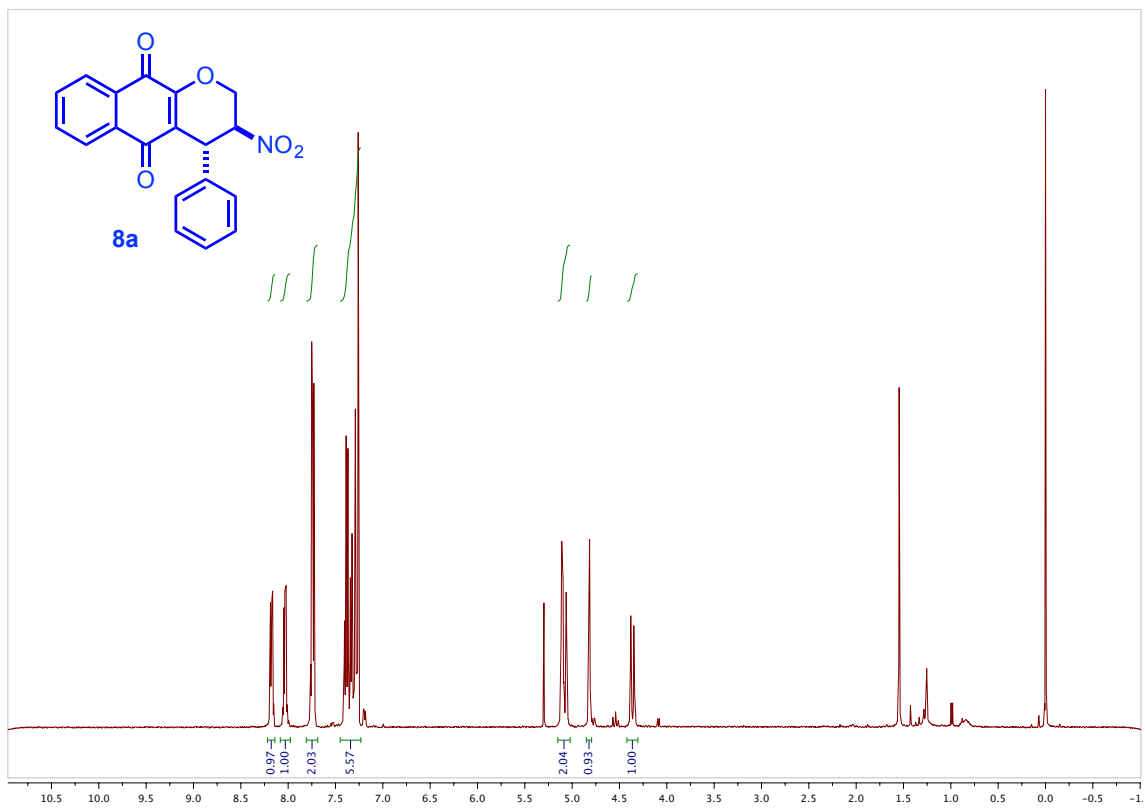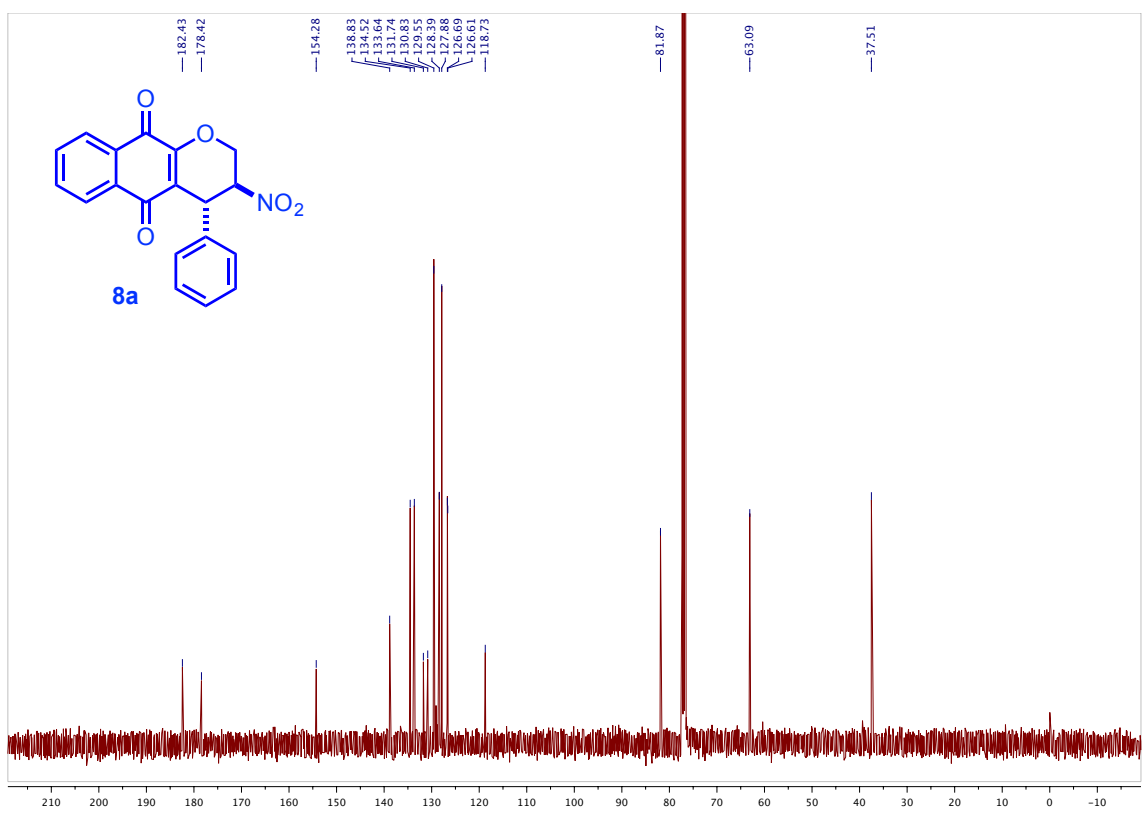

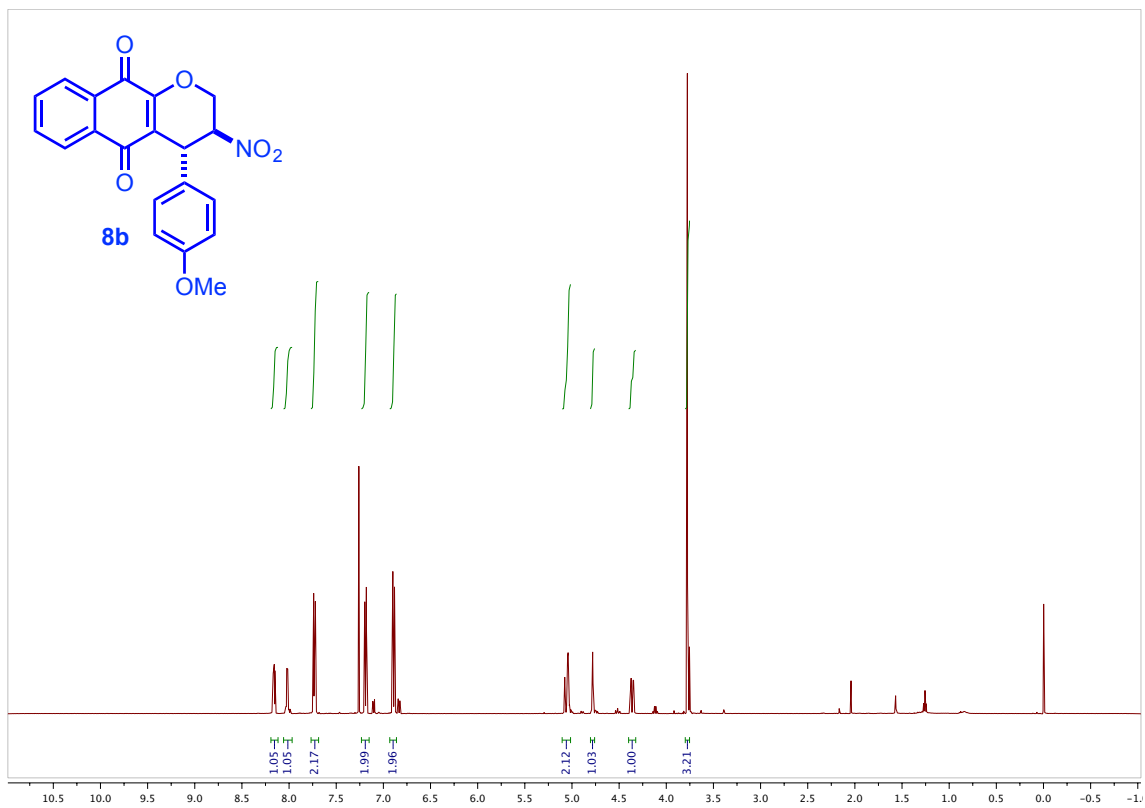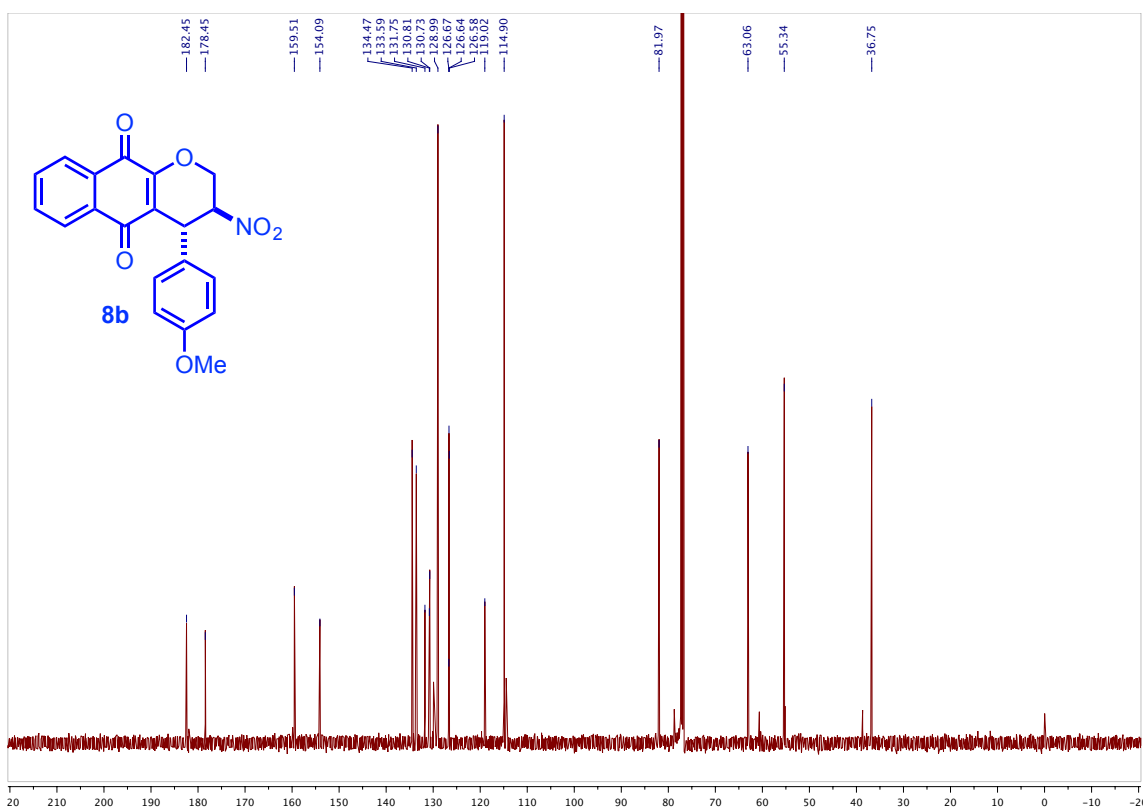

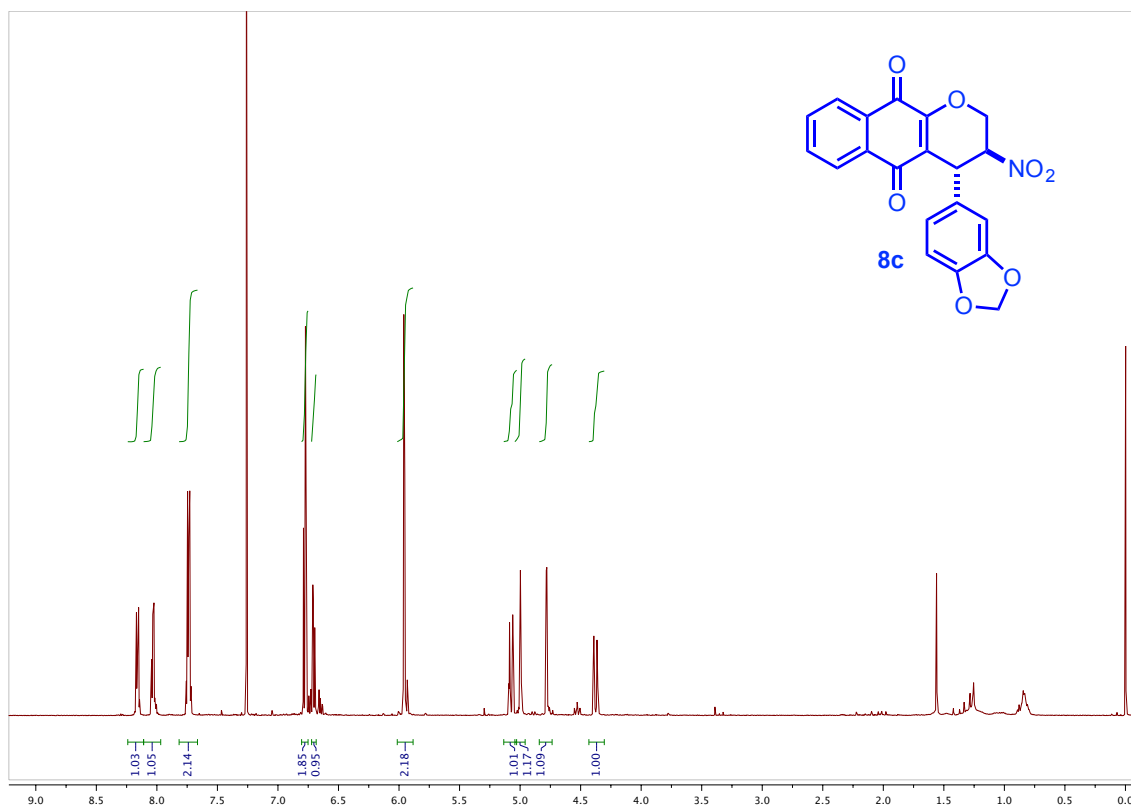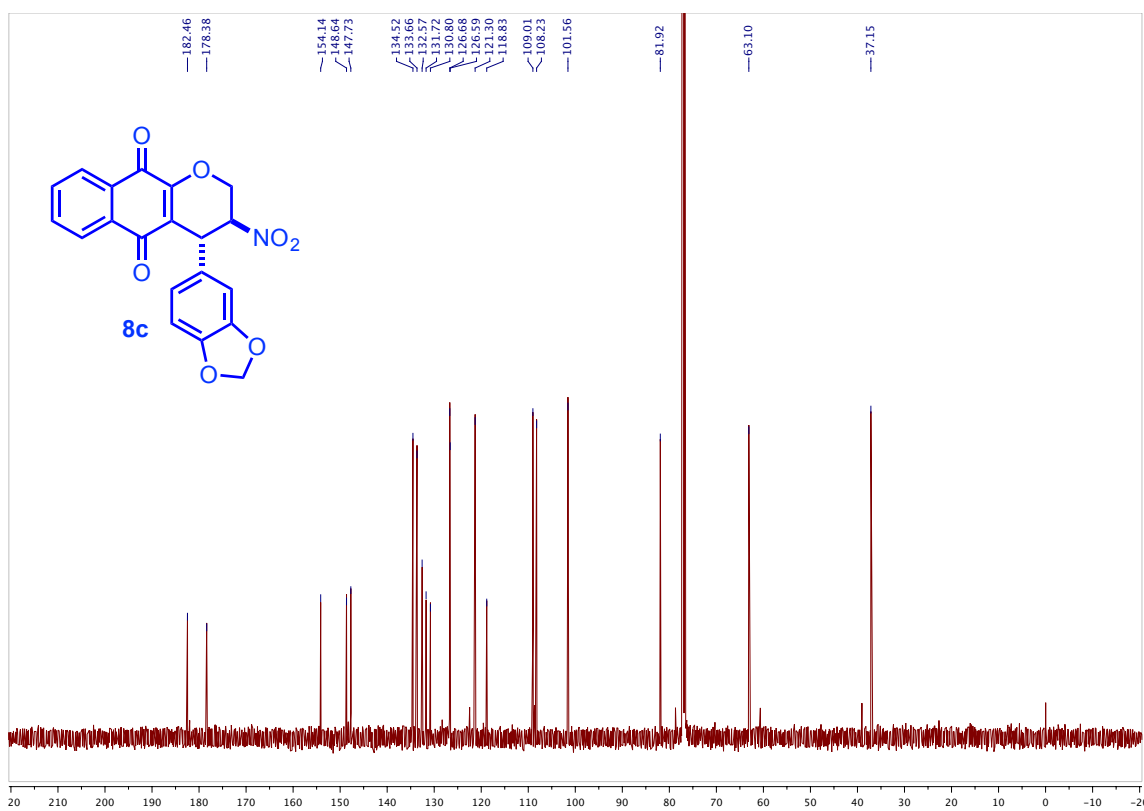



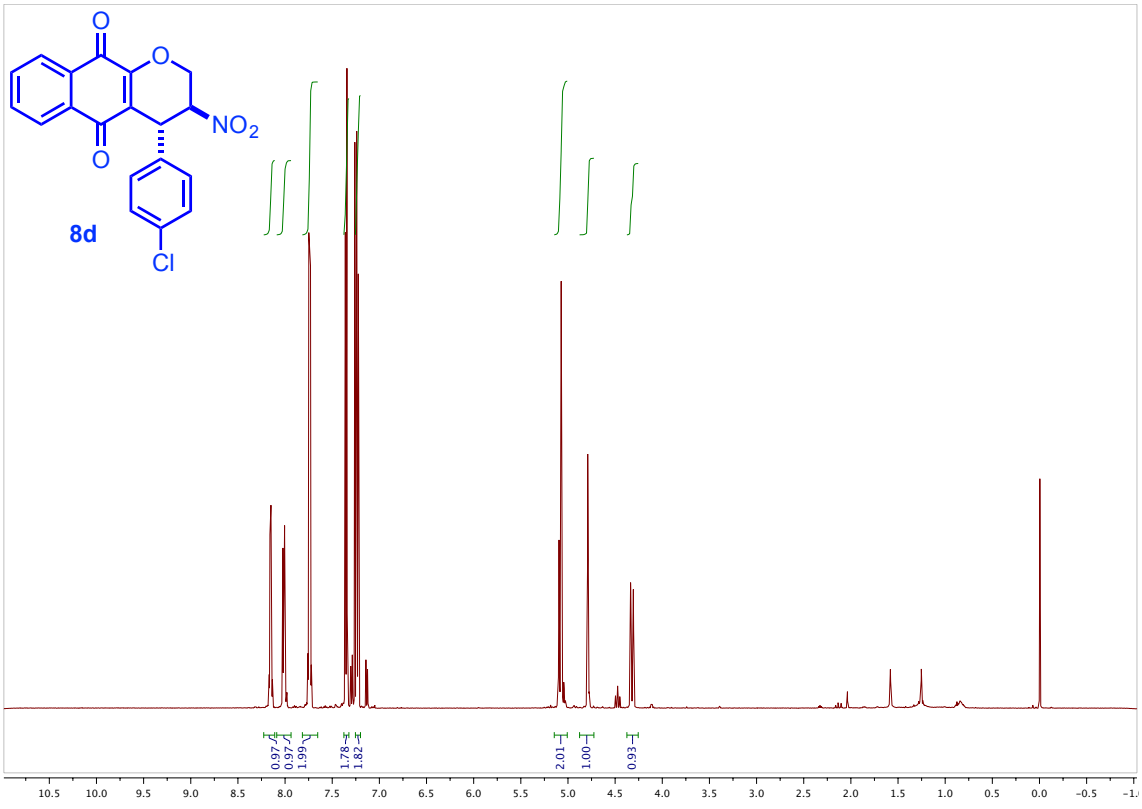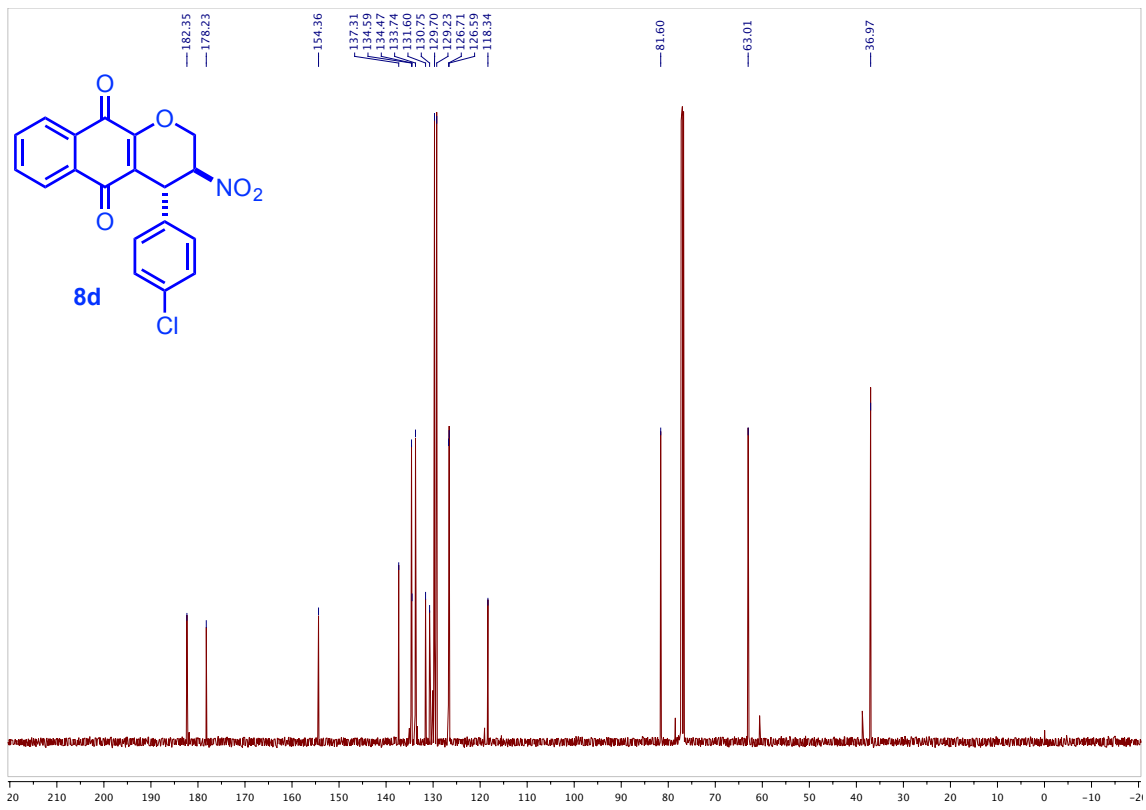

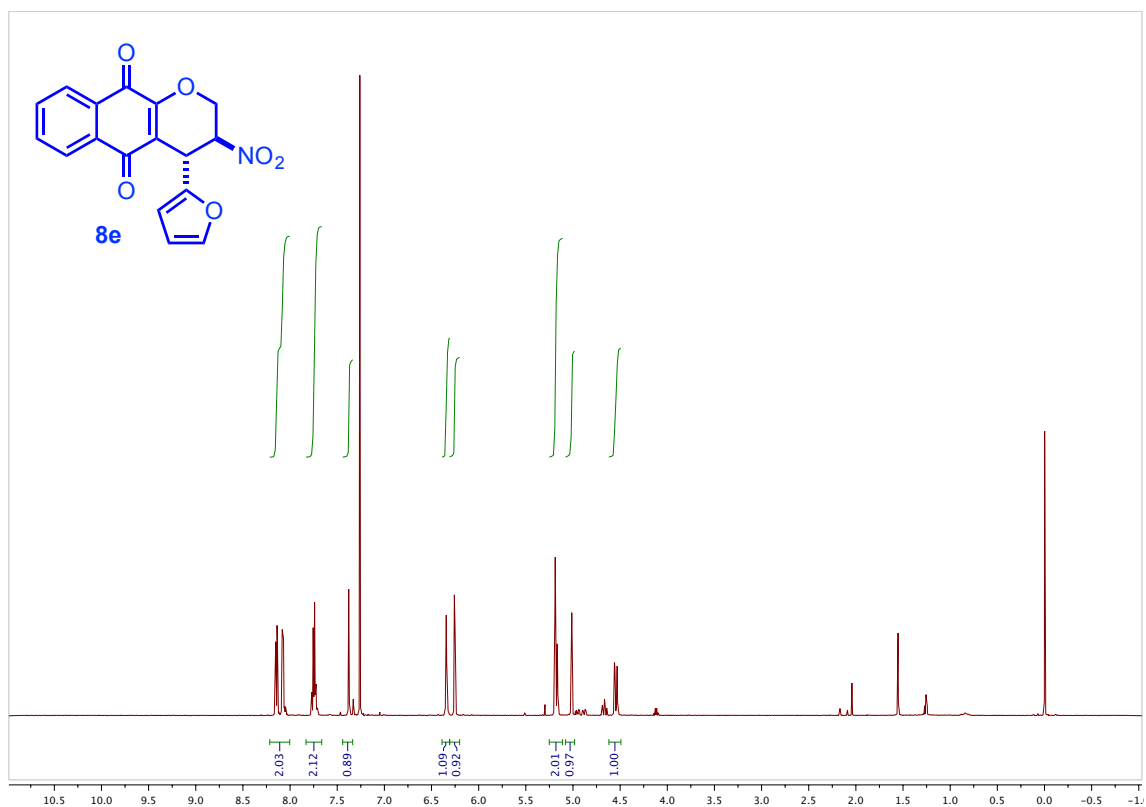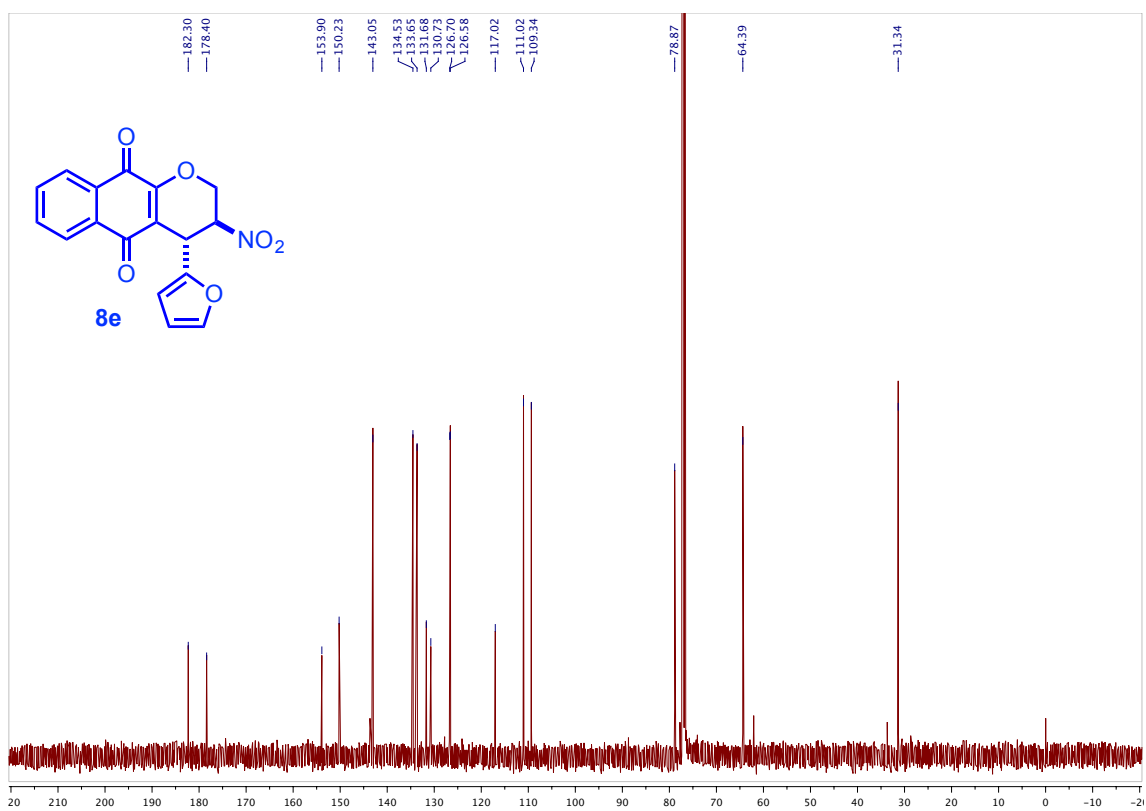

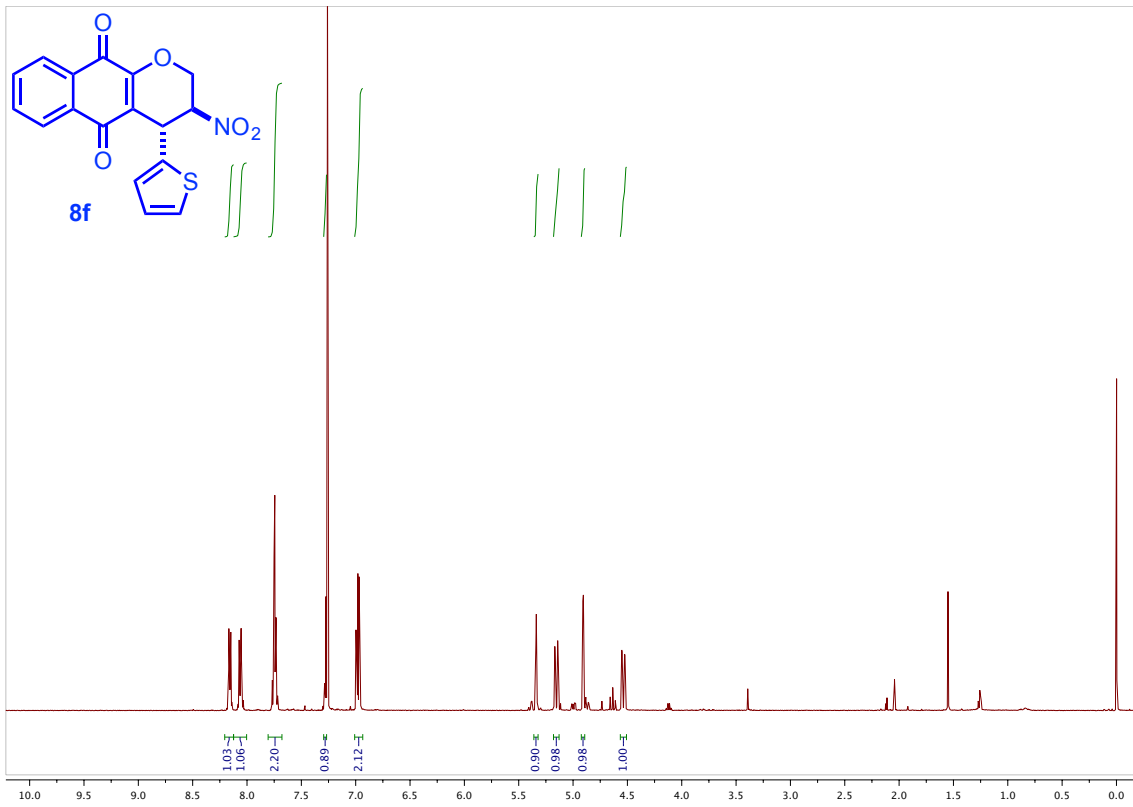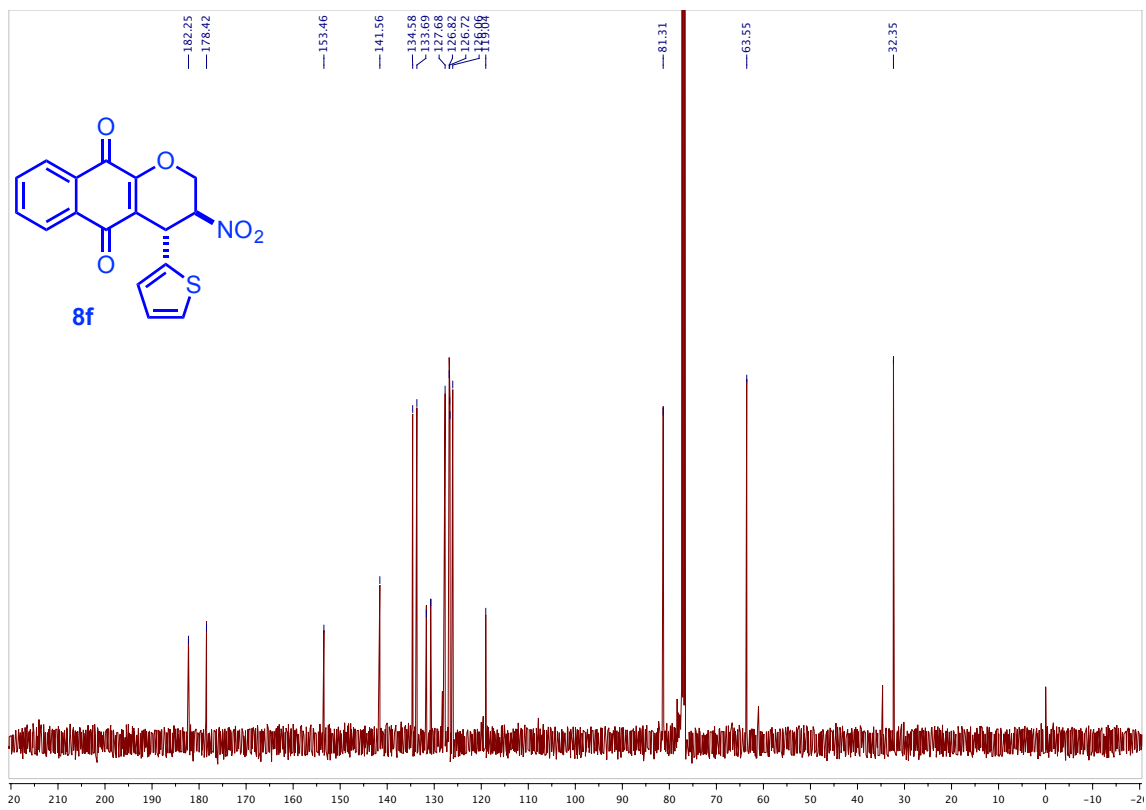

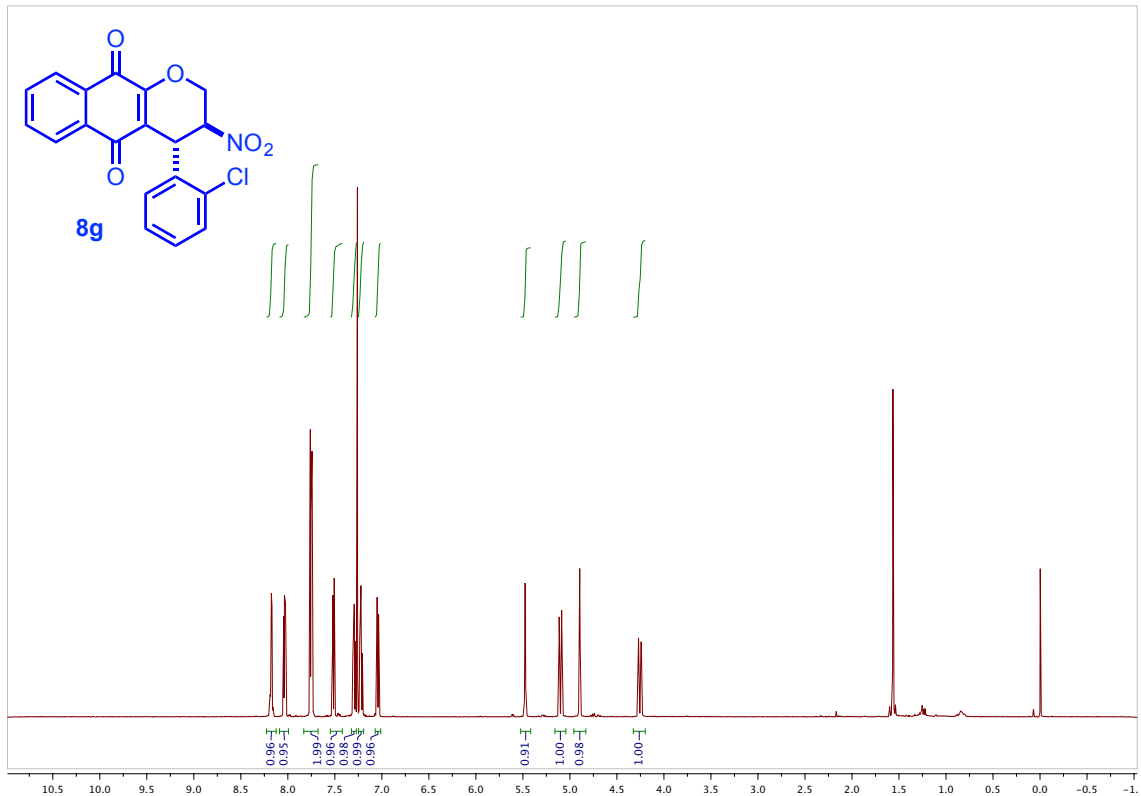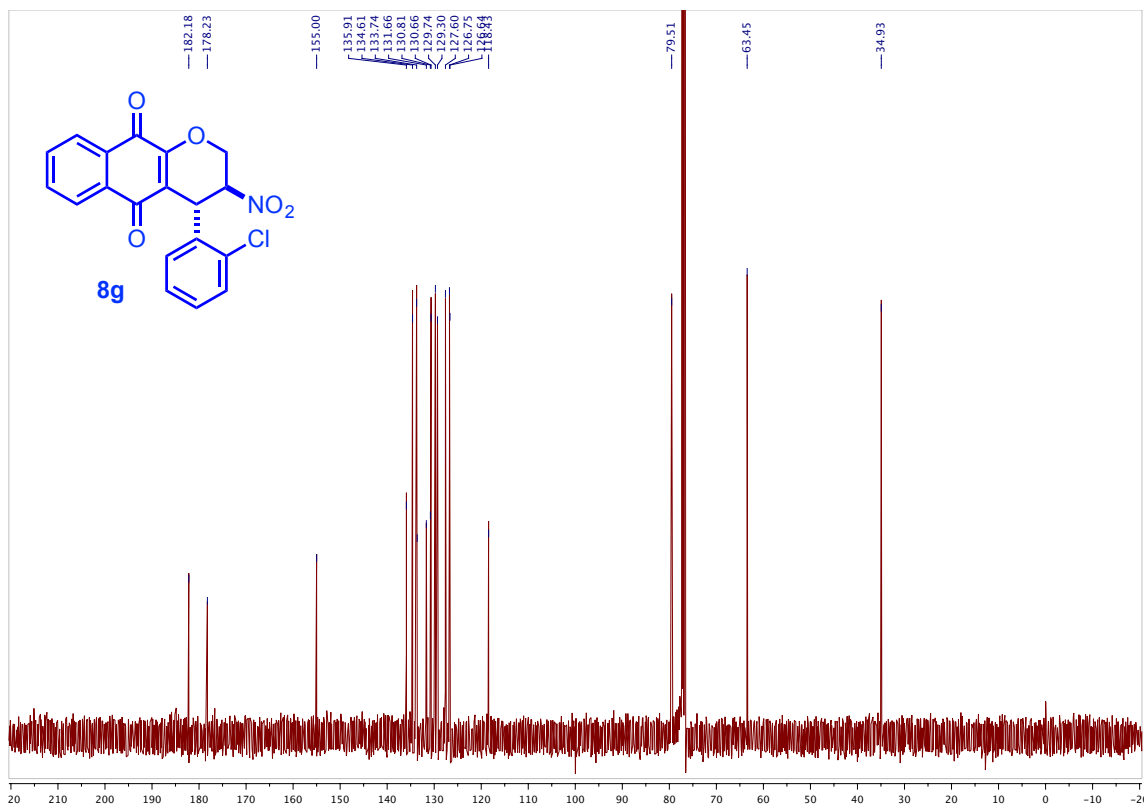

## 11. HPLC chromatograms

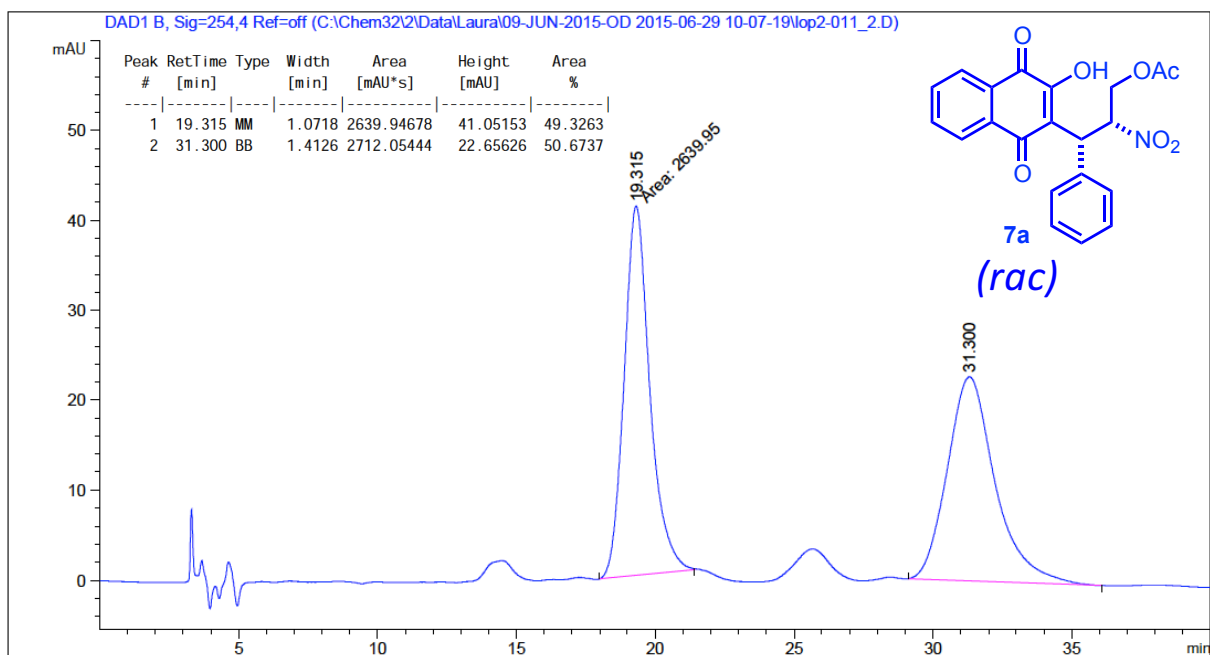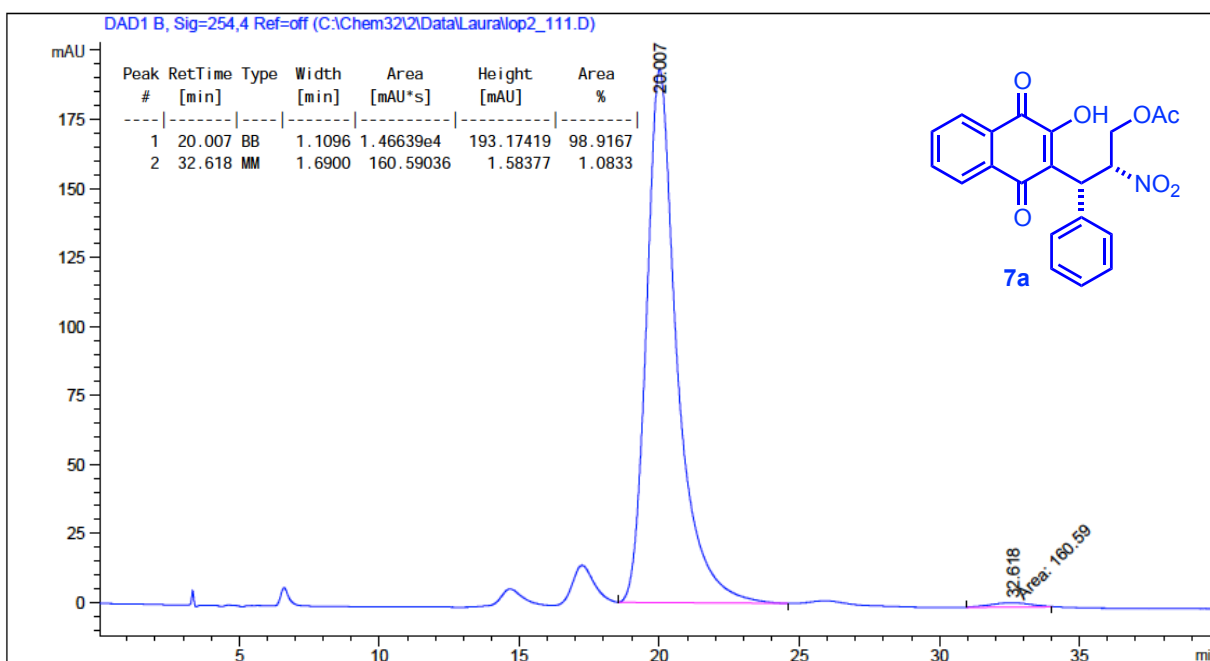

Sample Info : IC hex/IPA 75/25 1 ml/min 254nm

Additional Info : Peak(s) manually integrated

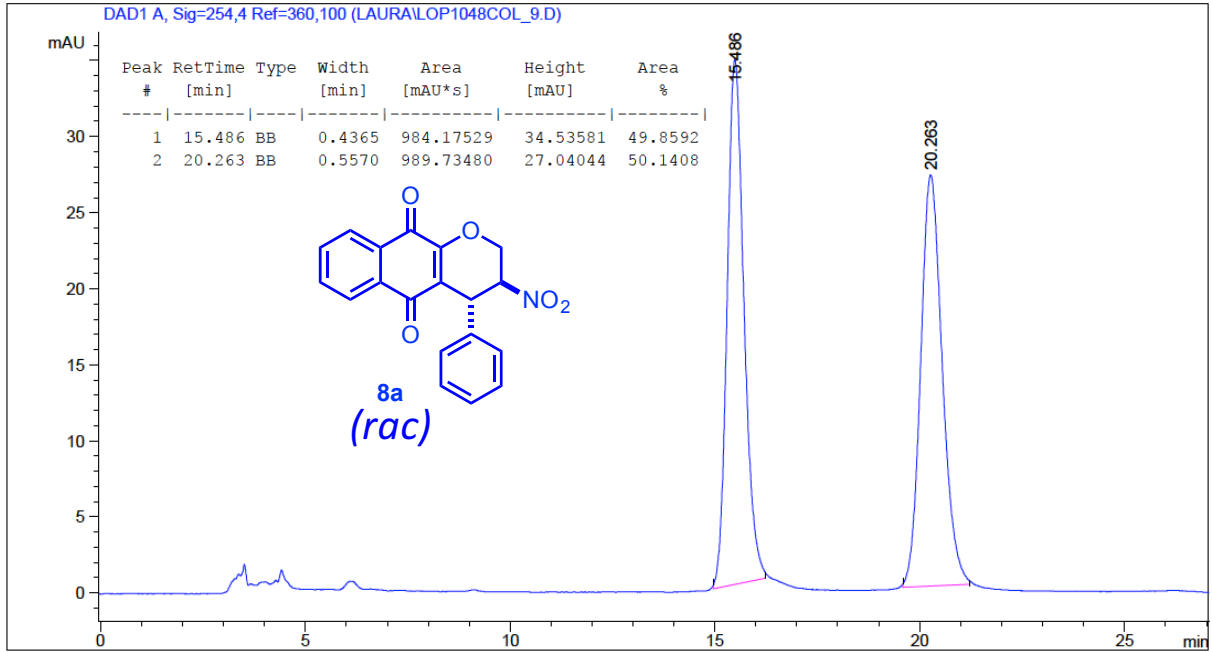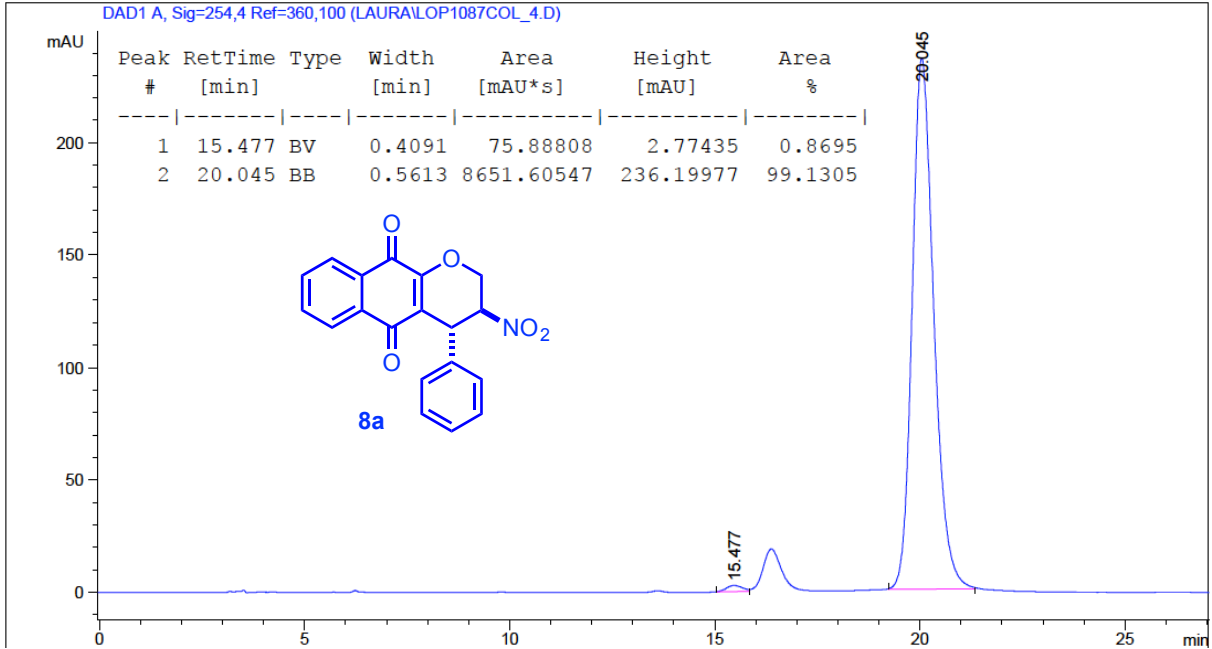

Sample Info : IA hex/IPA 70/30 1 mL/min 230 nm

Additional Info : Peak(s) manually integrated

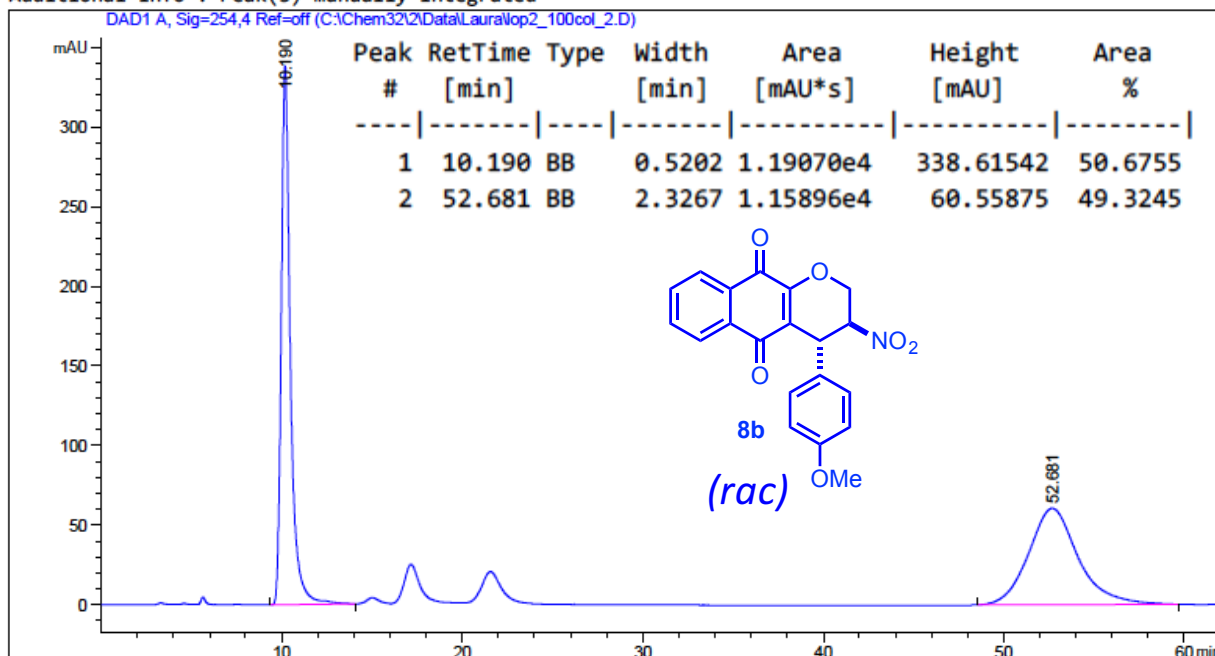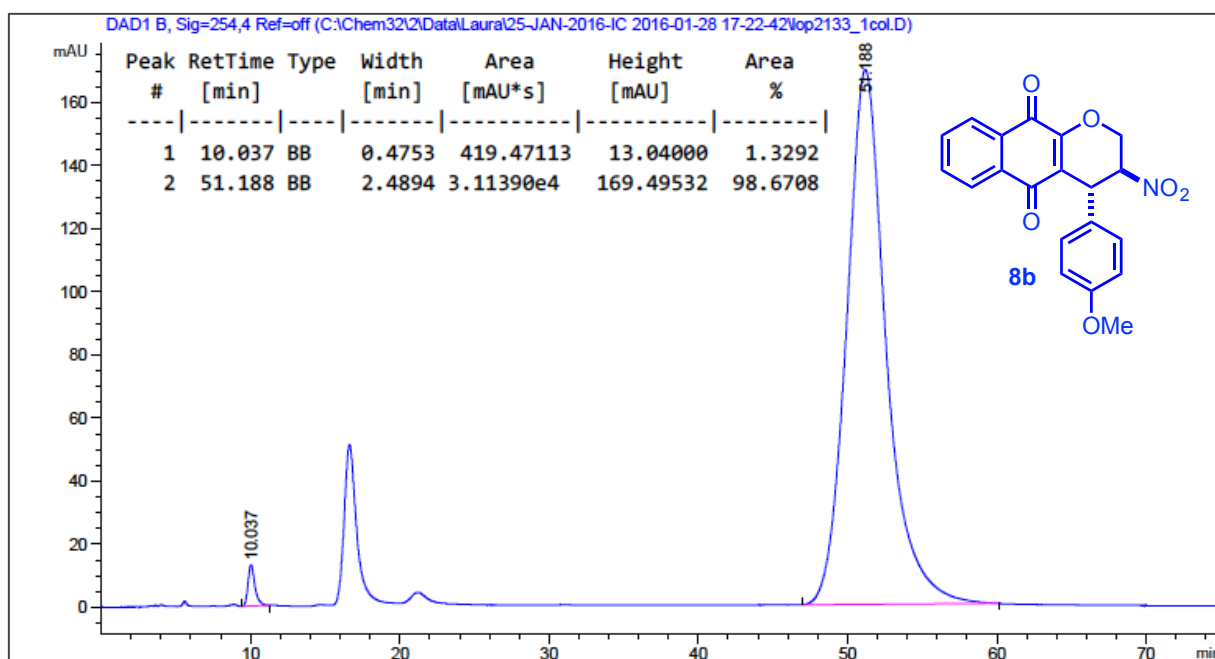

Sample Info : IA hex/IPA 70/30 1 mL/min 230 nm

Additional Info : Peak(s) manually integrated

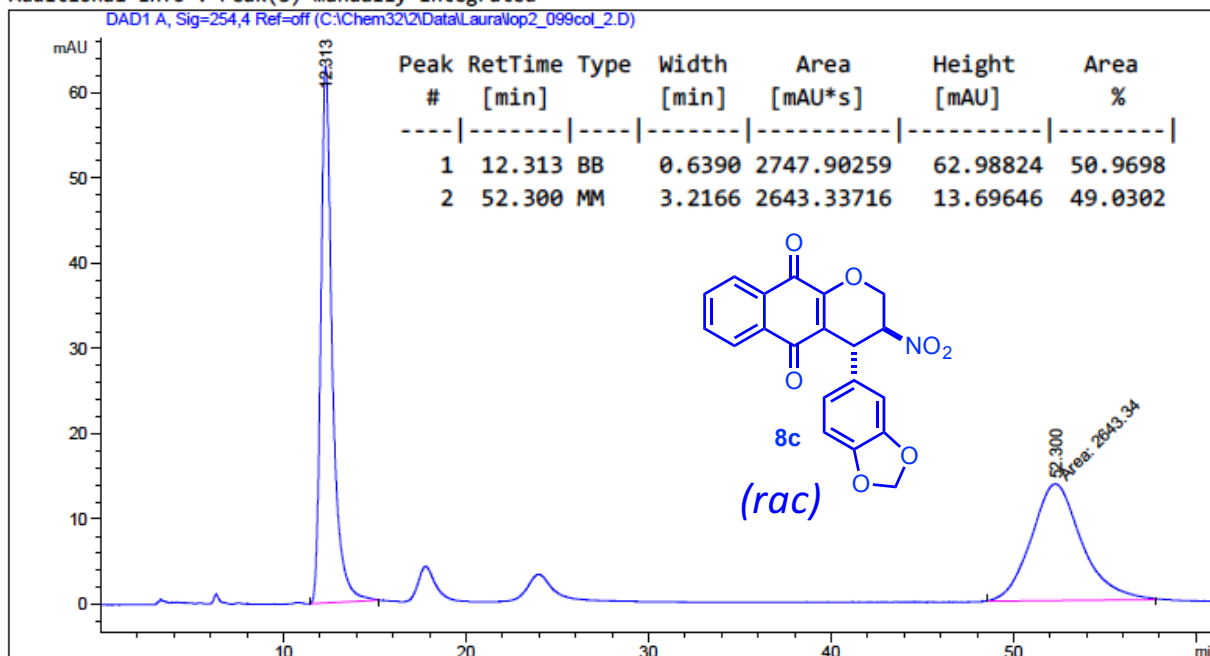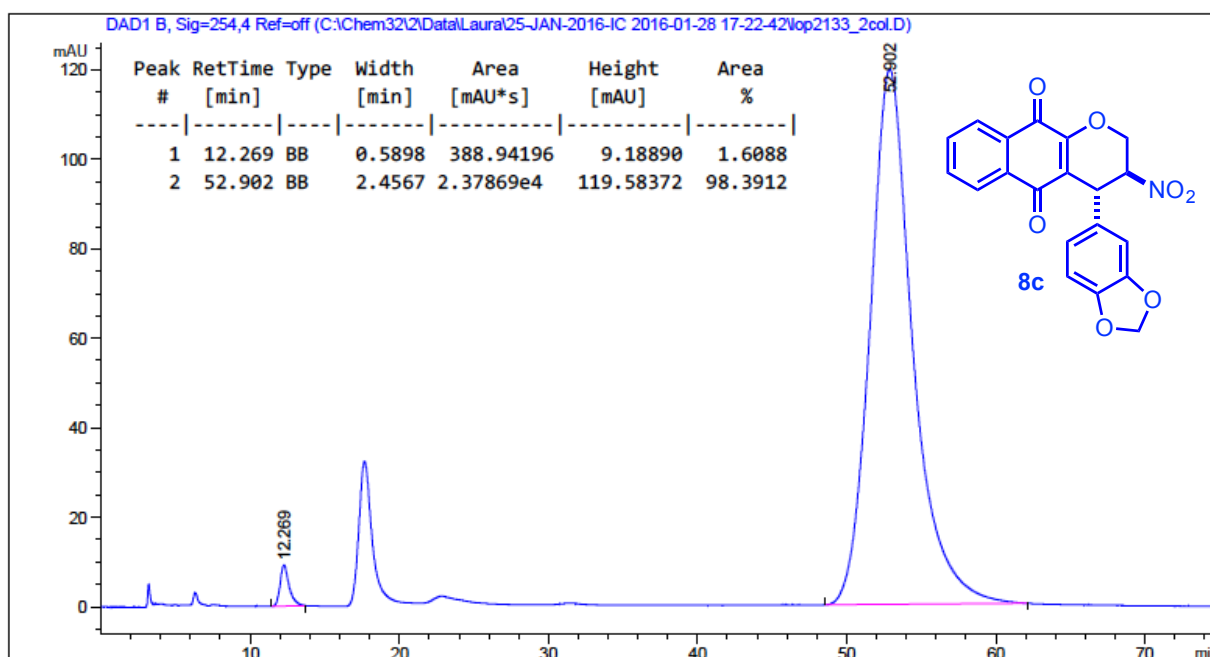



Sample Info : IA hex/IPA 70/30 1.0 mL/min 230 nm  
 racemic

Additional Info : Peak(s) manually integrated

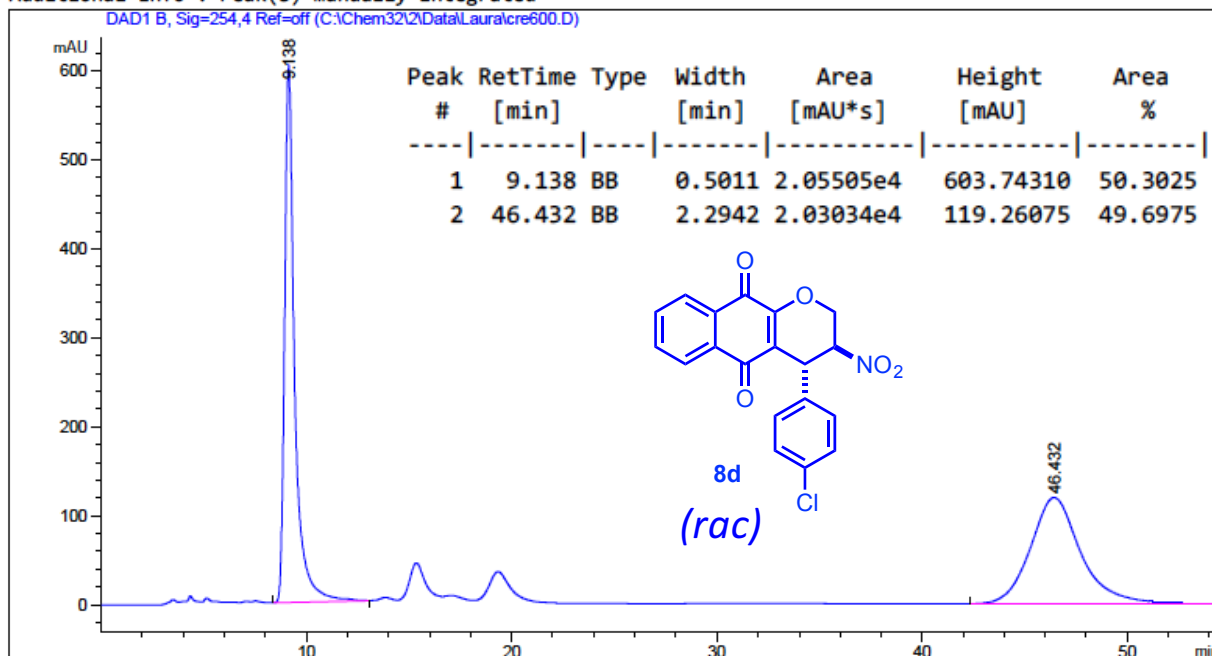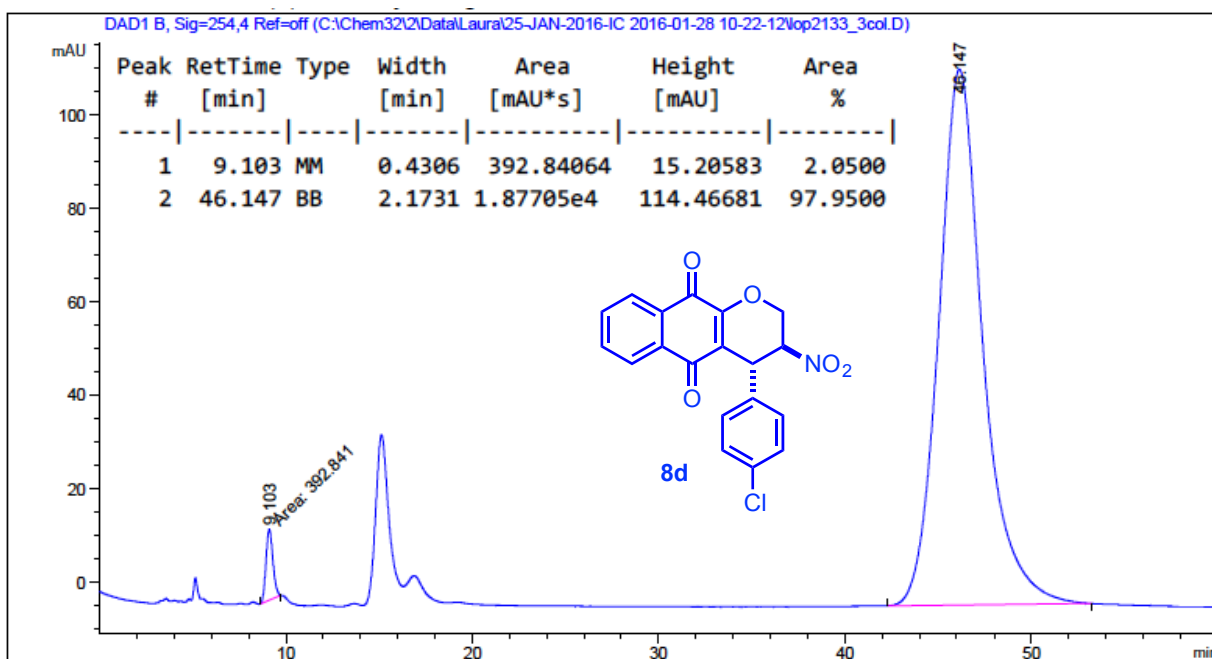

Sample Info : IA hex/IPA 70/30 1 mL/min 230 nm

Additional Info : Peak(s) manually integrated

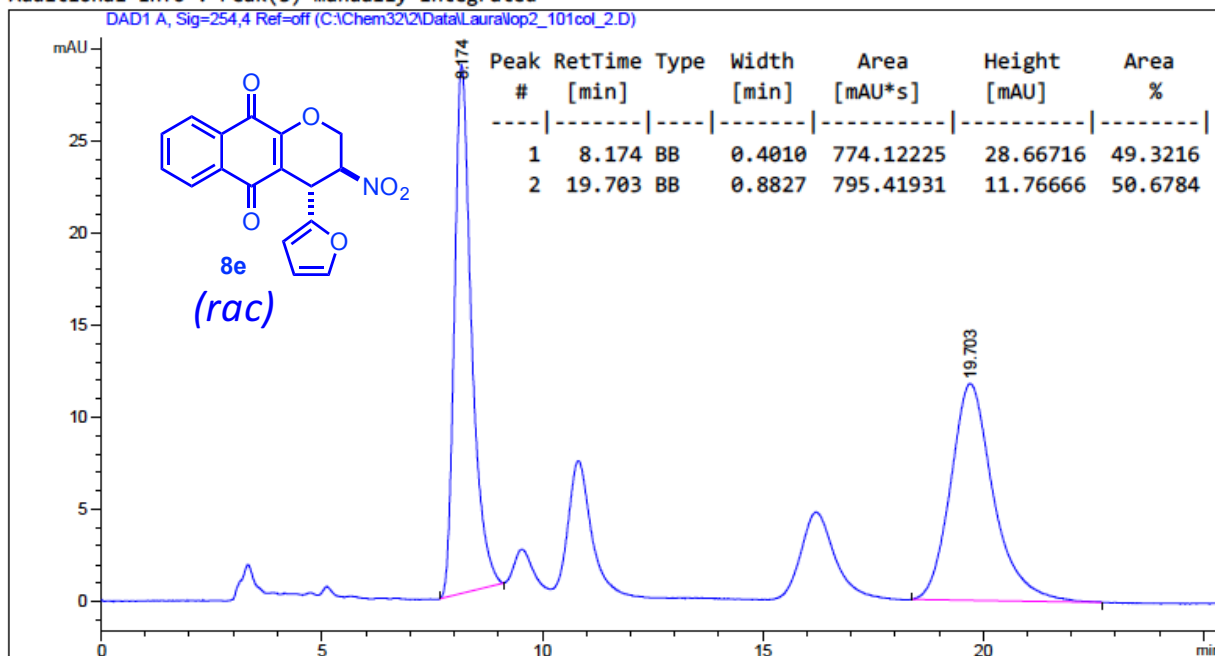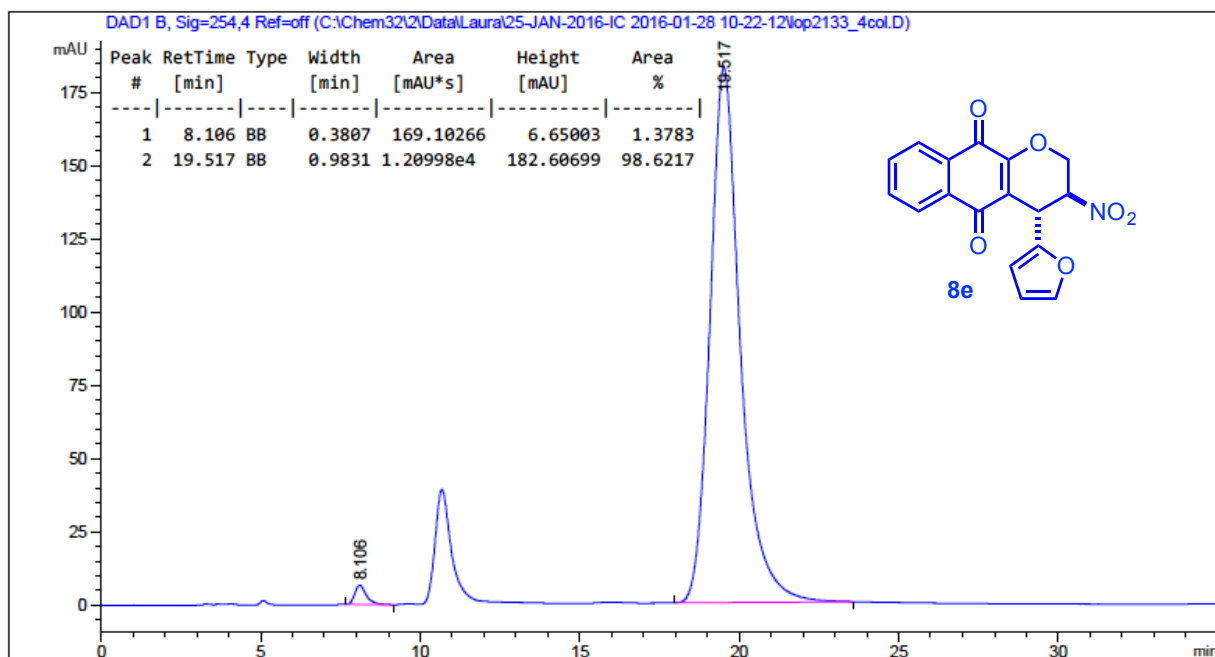

Sample Info : IA hex/IPA 70/30 1.0 mL/min 230 nm  
thienyl racemic

Additional Info : Peak(s) manually integrated

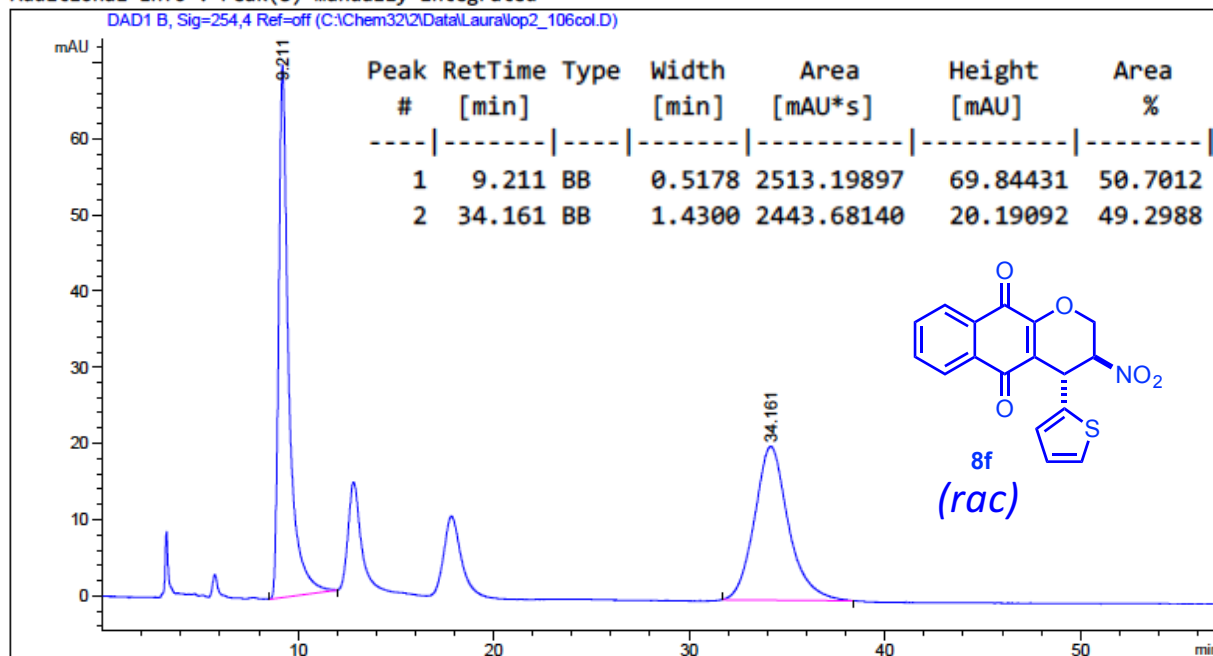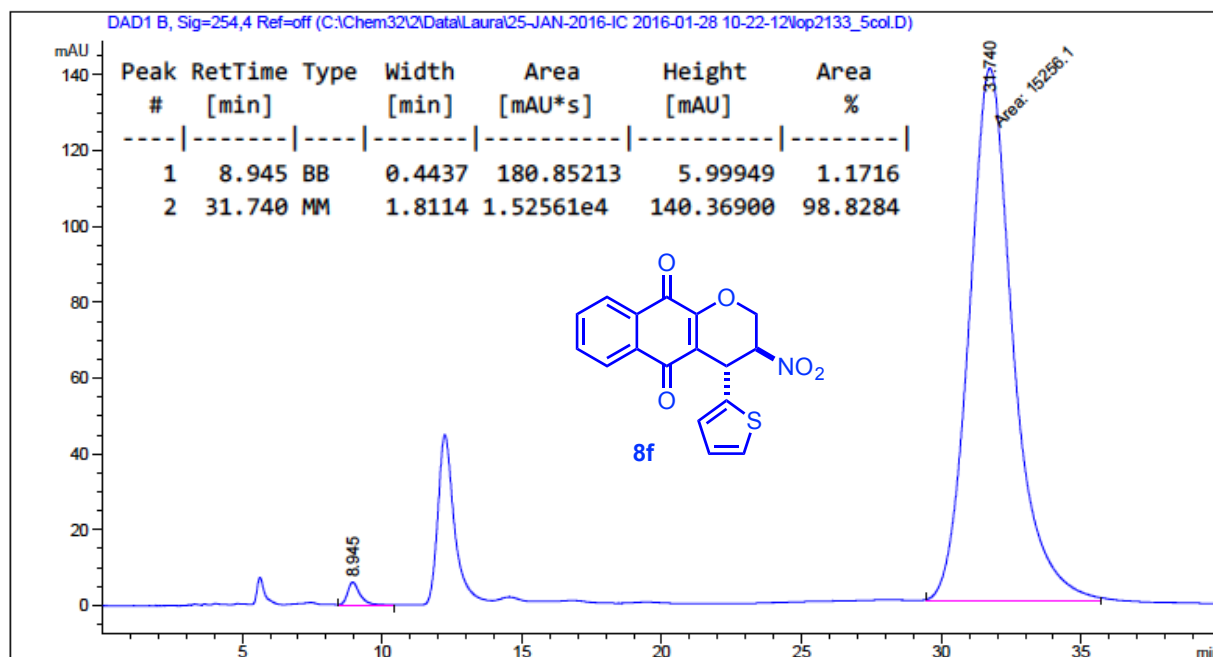

Sample Info : IA hex/IPA 70/30 1.0 mL/min 230 nm

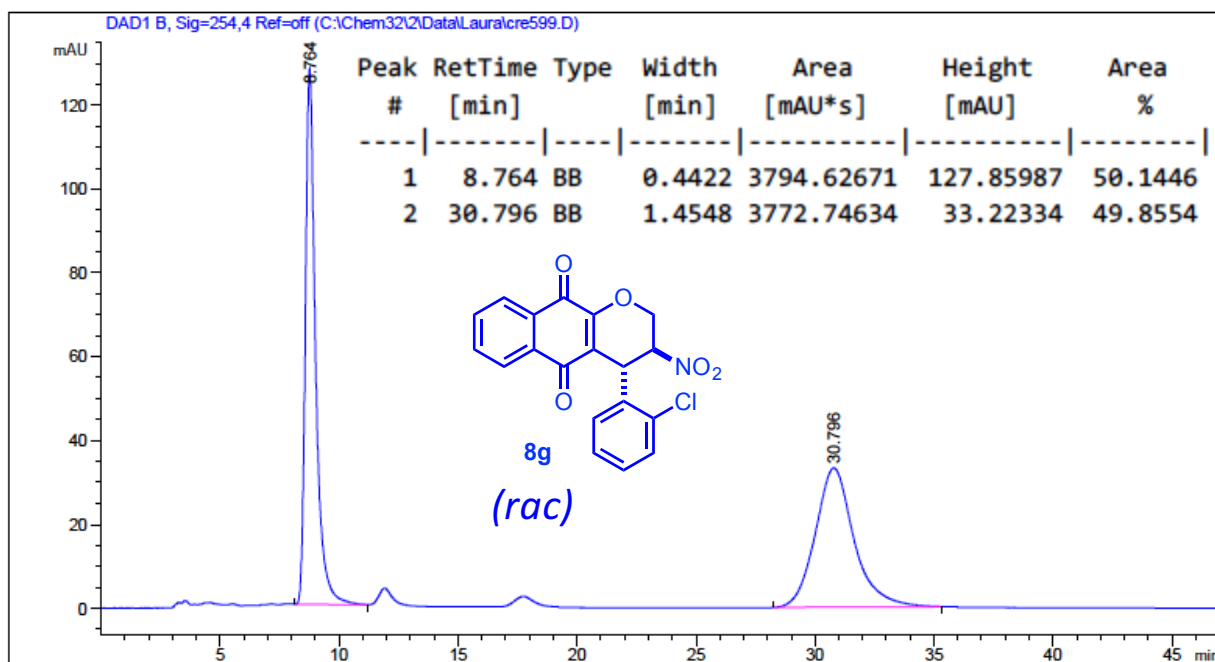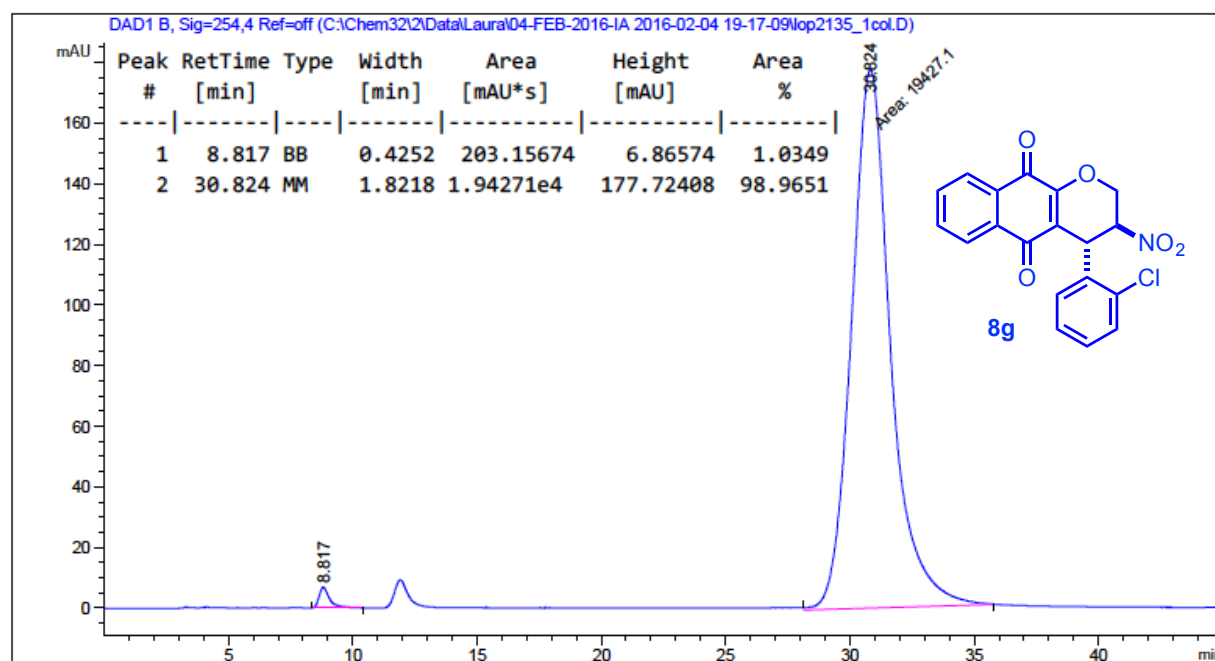

Supplement: c6cy00473c1.pdf [file c6cy00473c1.pdf]
